## Dynamic relocation of the cytosolic type III secretion system components ensures specific protein secretion

*Stephan Wimmi*<sup>1</sup>, *Alexander Balinovic*<sup>2</sup>, *Hannah Jeckel*<sup>2,3</sup>, *Lisa Selinger*<sup>1</sup>, *Dimitrios Lampaki*<sup>1\*</sup>, *Emma Eisemann*<sup>1\*</sup>, *Ina Meuskens*<sup>4</sup>, *Dirk Linke*<sup>4</sup>, *Knut Drescher*<sup>2,3</sup>, *Ulrike Endesfelder*<sup>2</sup> & *Andreas Diepold*<sup>1</sup>

1: Max Planck Institute for Terrestrial Microbiology, Department of Ecophysiology, Karl-von-Frisch-Str. 10, 35043 Marburg, Germany

2: Max Planck Institute for Terrestrial Microbiology, Karl-von-Frisch-Str. 10, 35043 Marburg, Germany

3: Department of Physics, Philipps-Universität Marburg, Karl-von-Frisch-Str. 16, 35043 Marburg, Germany

4: University of Oslo, Department of Biosciences, Blindernveien 31, 0371 Oslo, Norway

\* current addresses:

Dimitrios Lampaki, Max-Planck-Institut für Immunbiologie und Epigenetik, Stübeweg 51, 79160 Freiburg, Germany;

Emma Eisemann, James Madison University, 800 South Main St, Harrisonburg, VA 22807, USA

Correspondence: Andreas Diepold, [andreas.diepold@mpi-marburg.mpg.de](mailto:andreas.diepold@mpi-marburg.mpg.de), +49-6421-178302

Running title: Dynamic pH adaptation of the T3SS

1

2 **Abstract**

3 Many gastrointestinal pathogens use a type III secretion system (T3SS) to manipulate host cells.  
4 Protein secretion by the T3SS injectisome is activated upon contact to any host cell, and it has  
5 been unclear how premature effector secretion is prevented during infection. We found that at  
6 low external pH, such as in the stomach, the components at the proximal interface of the  
7 injectisome are temporarily released to the bacterial cytosol, preventing protein secretion. Low  
8 external pH is sensed in the periplasm and leads to a partial dissociation of the inner membrane  
9 injectisome component SctD, which in turn causes the dissociation of the cytosolic T3SS  
10 components. This effect is reversed upon restoration of neutral pH, allowing a fast activation of  
11 the T3SS at the native target regions within the host. These findings indicate that the cytosolic  
12 components form an adaptive regulatory interface, which regulates T3SS activity in response to  
13 environmental conditions.

14

15 **Introduction**

16 In order to proliferate in contact to eukaryotic host cells, both symbiotic and pathogenic bacteria have  
17 developed methods to influence host cell behavior. The type III secretion system (T3SS) injectisome  
18 is a molecular machinery used by various pathogenic bacterial genera including *Salmonella*, *Shigella*,  
19 pathogenic *Escherichia* and *Yersinia* to deliver molecular toxins – effector proteins – directly into the  
20 eukaryotic host cells. While the effectors differ among the different bacterial species (Büttner, 2012),  
21 and can have different functions in modulating the cytoskeleton, invading and escaping host cells or  
22 endosomes, or inducing host cell death (Coburn *et al.*, 2007; Hueck, 1998), the structural proteins of  
23 the injectisome are highly conserved. An extracellular needle is formed by helical polymerization of a  
24 T3SS-exported protein, and ends in a pentameric tip structure. At the proximal end, the needle is  
25 anchored by two multimeric membrane rings that span the outer and inner membrane. Additionally,  
26 the inner membrane (IM) ring encloses the export apparatus. At the cytosolic interface of the  
27 injectisomes, four soluble T3SS components (SctK/Q/L/N)<sup>a</sup> interact to form six pod structures (Hu *et*  
28 *al.*, 2017, 2015) (Fig. 1A).

29 The soluble T3SS components SctK, SctQ, SctL and SctN interact in a linear fashion (Jackson and Plano,  
30 2000), and the presence of all four proteins is needed for their assembly at the injectisome, and  
31 subsequently for effector secretion (Diepold *et al.*, 2017, 2010). SctK/Q/L form a high molecular  
32 weight complex that has been shown to bind chaperones and effectors (Lara-Tejero *et al.*, 2011). Since  
33 the cytosolic components do not co-purify with the rest of the needle, their structural arrangement  
34 has only been revealed by recent *in situ* cryo-electron tomography (Hu *et al.*, 2017, 2015; Nans *et al.*,  
35 2015), which showed the formation of six pod structures at the cytosolic interface of the injectisome.  
36 The connection between these pod structures and the membrane rings is established by the cytosolic  
37 component SctK, which binds to SctD. In the presence of SctK, the cytosolic domains of SctD (SctD<sub>c</sub>)  
38 rearrange and in the case of the *Salmonella* SPI-1 T3SS form six discrete patches of four SctD<sub>c</sub> each  
39 that interact with one SctK protein, which in turn connects to SctQ, SctL, and SctN (Hu *et al.*, 2017;  
40 Tachiyama *et al.*, 2019).

41 In addition to forming the injectisome-bound pod structures, the cytosolic components exist in a  
42 freely diffusing cytosolic state, with proteins exchanging between the two states (Diepold *et al.*, 2015).

---

<sup>a</sup> In this manuscript, T3SS refers to the virulence-associated T3SS. The common „Sct“ nomenclature (Hueck, 1998) is used for T3SS components, see (Diepold and Wagner, 2014) for species-specific names.

43 In the cytosol, SctK/Q/L/N form a dynamic adaptive network, with a variety of complexes of different  
44 stoichiometries that change their composition in response to different external conditions (Bernal et  
45 al., 2019; Diepold et al., 2017). Strikingly, protein interactions and exchange rates amongst the  
46 cytosolic components correlate with the activity of the injectisome (Diepold et al., 2017, 2015; Rocha  
47 et al., 2018). However, the precise role of the cytosolic components in the secretion process remains  
48 unclear to this date.

49 *Yersinia enterocolitica* is an extracellular gastrointestinal pathogen that employs its T3SS to  
50 downregulate immune responses and prevent inflammation after the penetration of the intestinal  
51 epithelium. For initial attachment to the epithelium, the bacteria employ a number of adhesins, with  
52 *Yersinia* adhesin A (YadA) as the key factor for establishing an infection (Meuskens et al., 2019). YadA  
53 interacts with a variety of extracellular matrix molecules, including collagen and fibronectin  
54 (Mühlenkamp et al., 2015b). YadA length is tightly linked to the length of the injection needle of the  
55 T3SS, and establishes close contact to the host cells enabling injection (Mota et al., 2005). *Y.*  
56 *enterocolitica* is usually taken up with contaminated food or water. The shift from environmental to  
57 host temperature (37°C) induces expression and assembly of the injectisomes as well as YadA  
58 (Cornelis, 2006; Tertti et al., 1992). The bacteria then have to pass the acidic environment of the  
59 stomach. During that time, the injectisome can already be present and ready for effector secretion.  
60 Since the T3SS readily translocates cargo into any host cell type it adheres to, including immune cells,  
61 epithelial cells and even red blood cells (Clerc et al., 1986; Håkansson et al., 1996), a distinct  
62 mechanism is needed to prevent premature activation of the T3SS during the passage of the stomach,  
63 which would result in a loss of valuable resources, or even elicit immune responses.

64 We hypothesized that the acidic environment in the stomach (external pH of 1.5 – 4.5 (Evans et al.,  
65 1988; McClements and Li, 2010), Fig. 1B) may be detected by the bacteria to inhibit effector secretion  
66 under these conditions. Here, we investigated this hypothesis with a combination of fluorescence  
67 microscopy, single particle tracking, and functional assays. Our findings show that although parts of  
68 the T3SS, including the extracellular needle, are stable at low pH, a set of cytosolic T3SS components  
69 temporarily unbind from the injectisome at low external pH. The reversible dissociation corresponds  
70 to a temporary suppression of effector secretion by the T3SS. This mechanism prevents premature  
71 activation of the T3SS, while ensuring a quick reactivation of the T3SS, once a pH-neutral environment  
72 is reached. Our data provide a striking example for how bacteria apply protein dynamics to adapt the  
73 function of a large macromolecular machine essential for virulence to external conditions.

74

## 75 **Results**

### 76 Resistance of *Y. enterocolitica* and its T3SS needles to low external pH

77 To investigate to which degree *Y. enterocolitica* can withstand a drop in external pH, bacterial cultures  
78 in exponential growth phase were exposed to different pH for 15 minutes at 28°C, and bacterial  
79 survival was monitored by a dilution series on neutral pH agar (Fig. 1C). The results show that *Y.*  
80 *enterocolitica* tolerates temporary incubation down to pH 3, with no or very little fitness decrease at  
81 pH 4 and above.

82 *Y. enterocolitica* adheres to host cells and other surfaces by adhesins, most importantly the trimeric  
83 adhesin YadA, and invasins (Keller et al., 2015; Leo et al., 2015; Mühlenkamp et al., 2015a). We thus  
84 tested whether low pH prevents the binding of YadA to collagen and more generally, of *Y.*  
85 *enterocolitica* cells to surfaces. Binding could be established at low pH in both cases (Fig. 1D, Suppl.  
86 [Movies 1-2](#)). These results suggest that to avoid protein translocation into non-host cells, secretion  
87 itself might be prevented at low pH.

88 To test under which conditions *Y. enterocolitica* secretes effectors, we performed a secretion assay  
89 where *Y. enterocolitica* cells primed for secretion were subjected to secreting media in the range from  
90 pH 8 to pH 4. Indeed, we observed that effector secretion did not occur at low pH (Fig. 1E). Lack of  
91 secretion is not due to lower protein synthesis at pH 4 (Suppl. Fig. 1), suggesting a specific mechanism  
92 to suppress secretion at low external pH.

93 But how does *Y. enterocolitica* prevent secretion at low pH? To determine if the absence of secretion  
94 is due to a complete disassembly of injectisomes at that pH, we visualized the needles at different pH  
95 values and over time by labeling an introduced cysteine residue with a maleimide-linked dye (Milne-  
96 Davies et al., 2019). The needles were stable at pH 4 over continued time periods (Fig. 1F).

97 Taken together, *Y. enterocolitica* as well as the injectisome needles can withstand low external pH  
98 conditions, but still effectors are not secreted.

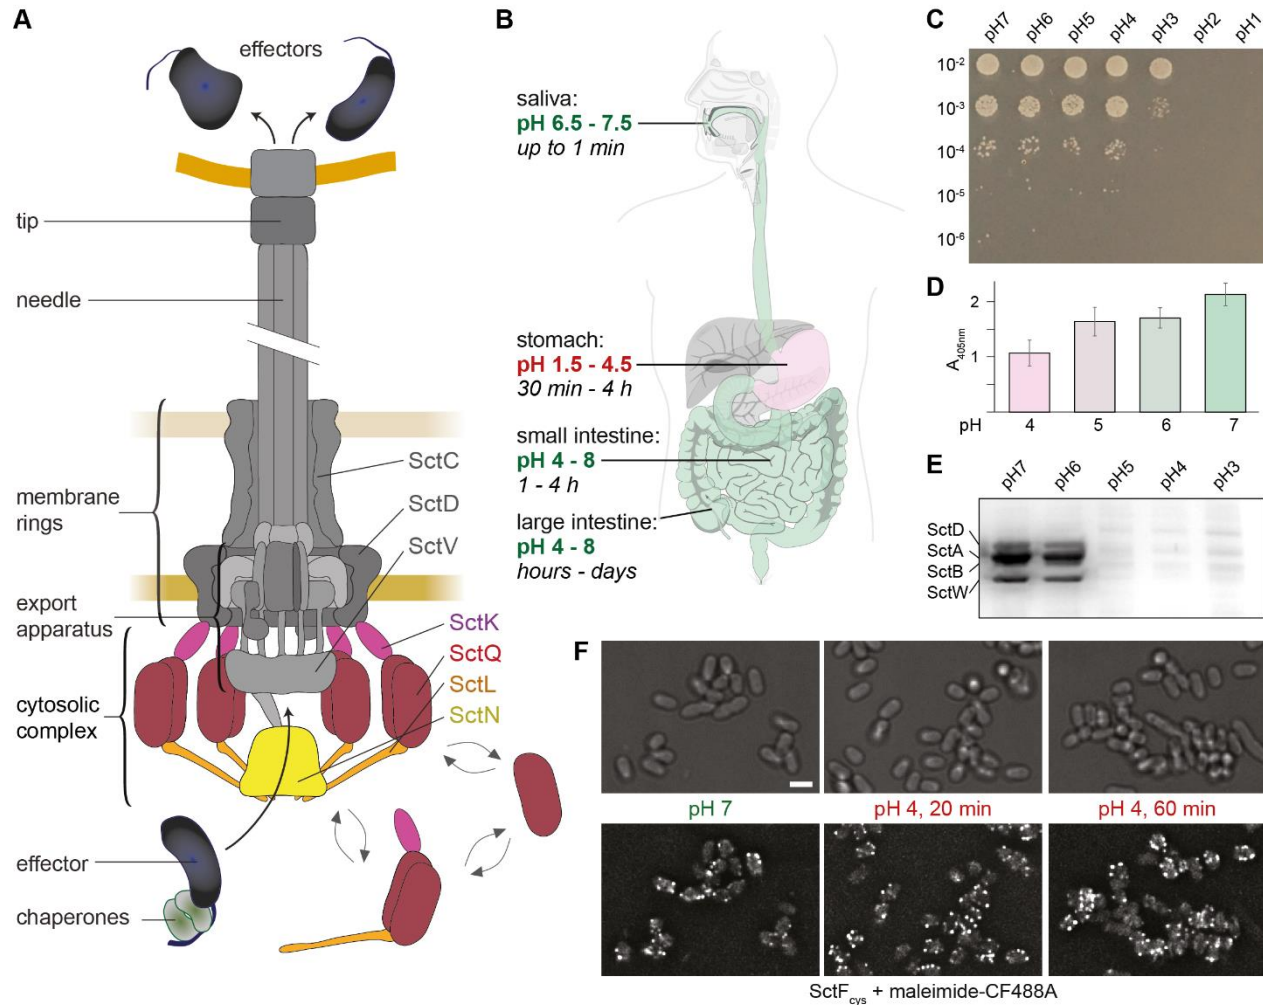

99

100 **Fig. 1 – The *Yersinia enterocolitica* T3SS and its function and stability at low pH**

101 (A) Schematic representation of the active T3SS injectisome (modified from (Diepold and Wagner, 2014)). Left  
 102 side, description of main substructures; right side, names of T3SS components studied in this manuscript. (B)  
 103 pH ranges and typical retention times at different parts of the gastrointestinal system (Evans *et al.*, 1988;  
 104 McClements and Li, 2010). Digestive tract image based on the public domain template  
 105 [https://commons.wikimedia.org/wiki/File:Digestive\\_system\\_diagram\\_de.svg](https://commons.wikimedia.org/wiki/File:Digestive_system_diagram_de.svg). (C) Dilution drop test of  
 106 *Y. enterocolitica* cultures incubated at the indicated pH for 15 minutes. (D) Binding of the *Y. enterocolitica*  
 107 adhesin YadA to collagen at the indicated pH values. Absorption at 405 nm resulting from Ni<sup>2+</sup>-HRP binding to  
 108 YadA-His<sub>6</sub> incubated with plate-absorbed calf collagen type I. *n* = 3, error bars denote standard deviation. (E) *In*  
 109 *vitro* secretion assay showing the export of native T3SS substrates (indicated on left side) at the indicated  
 110 external pH values. (F) Staining of T3SS needles at the different indicated external pH values; time indicates the  
 111 duration of pH 4 treatment. A strain expressing the mutated needle subunit SctF<sub>cys</sub> was covalently labeled with  
 112 maleimide-CF488A. Scale bar, 2 μm.

113

114 Association of the dynamic cytosolic T3SS components to the injectisome is temporarily suppressed  
115 at low external pH

116 We have recently found that the cytosolic T3SS components (SctK/Q/L/N) form a dynamic network,  
117 where protein exchange is connected to the function of the injectisome (Fig. 1A) (Diepold et al., 2017,  
118 2015). Hence, we wondered whether these dynamic components could be involved in the inhibition  
119 of secretion at low pH. To investigate this question, we performed flow-cell-based total internal  
120 reflection fluorescence (TIRF) microscopy with functional N-terminal fluorescent protein fusions of  
121 the cytosolic components, expressed at native levels<sup>b</sup>: EGFP-SctK, EGFP-SctQ, EGFP-SctL and EGFP-  
122 SctN (Fig. 1A) (Diepold et al., 2017, 2010). At neutral or near-neutral pH, the cytosolic components  
123 localized in foci at the bacterial membrane, which represent their injectisome-bound state (Diepold  
124 et al., 2010). However, at an external pH of 4, all cytosolic components lost this punctuate localization,  
125 and the proteins relocated to the cytosol (Fig. 2 ABC). The relocation remained stable over time at low  
126 external pH (Suppl. Fig. 2). Strikingly, this phenomenon was reversible: Upon exposure to neutral  
127 external pH, the foci recovered within a few minutes (Fig. 2ABC). This effect was observed both under  
128 secreting and non-secreting conditions (Suppl. Fig. 3A), and was independent of the fluorophore or  
129 visualization tag that was used (Suppl. Fig. 3B). Dissociation and re-association of the cytosolic T3SS  
130 components in response to the external pH was reversible in several cycles (Suppl. Movie 3). This  
131 reversible response to low pH was also observed both under secreting and non-secreting conditions  
132 (presence of 5 mM CaCl<sub>2</sub> and EGTA, respectively) (Suppl. Fig. 4).

133 To determine the kinetics of association and dissociation of SctQ, we monitored EGFP-SctQ foci in the  
134 flow cell after a pH drop from 7 to 4 and *vice versa*. Foci gradually disappeared within two minutes  
135 under secreting condition (Fig. 2D, Suppl. Fig. 5, Suppl. Movie 4). Upon restoration of neutral external  
136 pH, the first distinct foci were visible after 50 seconds, and further increased in abundance and  
137 brightness over time (Suppl. Fig. 6, Suppl. Movie 5).

138 To test whether the recovery of foci was due to the synthesis of new proteins or if the previously  
139 bound proteins rebind to the injectisomes, we covalently labeled the pool of Halo-tagged SctL with  
140 the Janelia Fluor JF-646 Halo ligand dye (Grimm et al., 2017) prior to the incubation at pH 4 to ensure  
141 that only the protein pool present at the time of labelling was fluorescent. Similar to the previous

---

<sup>b</sup> All fusion proteins used in this study are expressed from the native genetic environment; the genes replace the wild-type genes by allelic exchange (Kaniga et al., 1991).

142 experiments, we observed a reversible loss of fluorescent foci at the membrane and an increase in  
143 cytosolic signal at pH 4 and rebinding of the fluorescent proteins upon changing pH to 7. Also, an  
144 overlay of the micrograph at pH 7 before and after the incubation at pH 4 further indicated that the  
145 foci reform at the same position as they previously appeared (Fig. 2E).

146 Taken together, our data indicate that the cytosolic components reversibly dissociate from the  
147 injectisome at low external pH. Upon exposure to neutral pH, proteins from the same pool rebind at  
148 the cytosolic interface of the injectisome, forming the potential basis for a regulatory mechanism for  
149 the prevention of secretion at low pH.



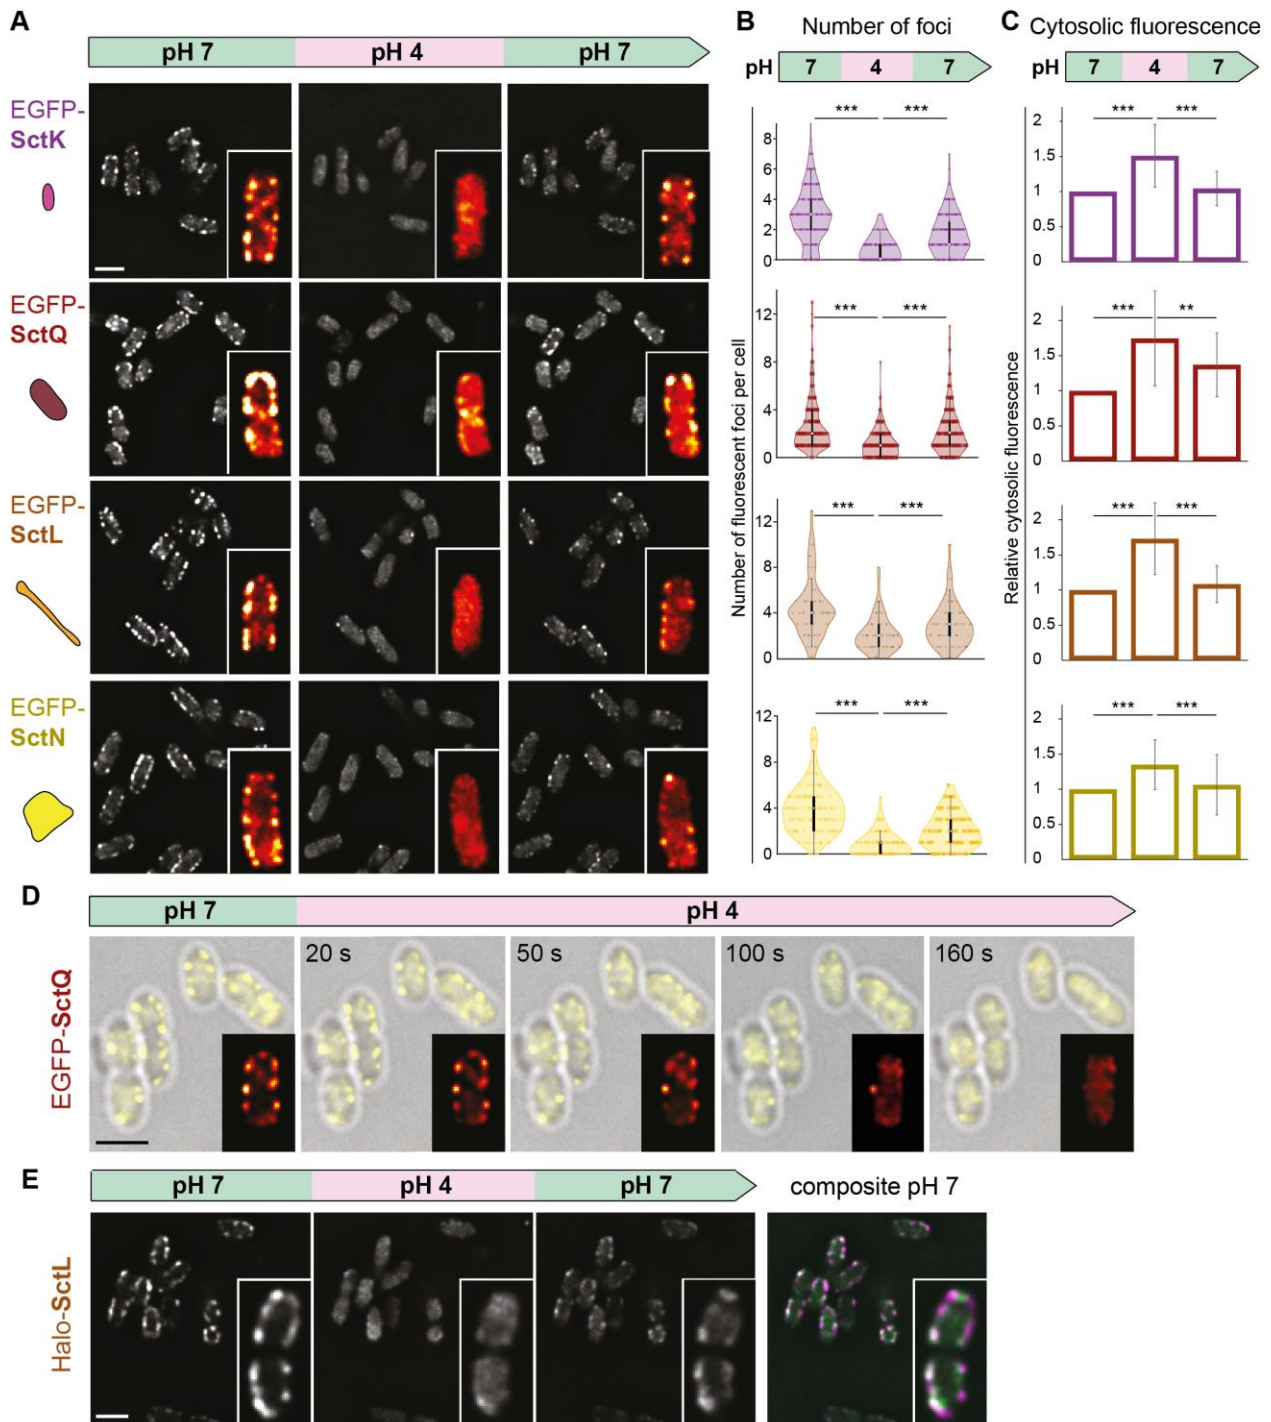

**Fig. 2 – The cytosolic T3SS components temporarily dissociate from the injectisome at low external pH**

(A) Fluorescent micrographs of the indicated proteins in live *Y. enterocolitica*, consecutively subjected to different external pH in a flow cell. Images were taken under secreting conditions, 10 minutes after bacteria were subjected to the indicated pH. Insets, enlarged single bacteria, visualized with the ImageJ red-hot color scale. (B) Quantification of foci per bacterium for the strains and conditions shown in panel (A).  $n = 324, 320, 220, 117$  foci (from top to bottom) from 2-3 fields of view from a representative experiment. (C) Quantification of mean cytosolic fluorescence for the strains and conditions shown in panel (A).  $n = 50$  cells from 2 independent

150

151

152

153

154

155

156

157

158 experiments per strain. For (B) and (C), error bars denote standard deviation; \*/\*\*/\*\*\*,  $p < 0.05/0.01/0.001$  in  
159 homoscedastic two-tailed t-tests. The values at pH 7 before and after incubation at pH 4 differ statistically  
160 significantly for (B) (\*\*\*), but not for (C) ( $p > 0.05$ ), except for SctQ (\*\*\*) and SctL (\*). (D) Kinetics of EGFP-SctQ  
161 dissociation after pH shift from 7 to 4. Overlay of phase contrast (grey) and fluorescence images (yellow); insets,  
162 enlarged single bacterium, visualized with the ImageJ red-hot color scale. (E) Fluorescence micrographs of Halo-  
163 SctL, labeled with JF-646 prior to the first image, during consecutive incubation at different external pH as in  
164 (A). Right, overlay of fluorescence distribution at pH prior to and after pH 4 incubation (magenta and green,  
165 respectively). Scale bars, 2  $\mu\text{m}$

166

### 167 Molecular mechanism of extracellular pH sensing

168 What is the molecular basis for the dissociation of the cytosolic T3SS components at low external pH?  
169 To find out whether the pH is sensed intracellularly, we first tested the impact of the changed external  
170 pH on the cytosolic pH, using a ratiometric pHluorin GFP variant (pHluorin<sub>M153R</sub> (Miesenböck et al.,  
171 1998; Morimoto et al., 2011)) as a pH sensor. Upon changing the external pH from 7 to 4, the cytosolic  
172 pH dropped to a mildly acidic value (pH 6.3-6.4). This cytosolic pH was retained for at least 30 minutes  
173 at external pH 4, but quickly recovered upon re-establishment of neutral external pH (Fig. 3A).

174 To test if the observed mild drop in cytosolic pH directly causes the dissociation of the cytosolic  
175 complex, we treated bacteria with the proton ionophore 2,4-dinitrophenol, which attunes the  
176 cytosolic pH to the external pH (Dechant et al., 2010; Hong et al., 1979; Petrovska et al., 2014) (Suppl.  
177 Fig. 7), and visualized the localization of EGFP-SctQ at different pH values. EGFP-SctQ remained  
178 localized in foci representing assembled cytosolic complexes at pH 6.3 and below (Fig. 3B), indicating  
179 that the observed disassembly of the cytosolic complex is not caused by acidification of the cytosol.

180

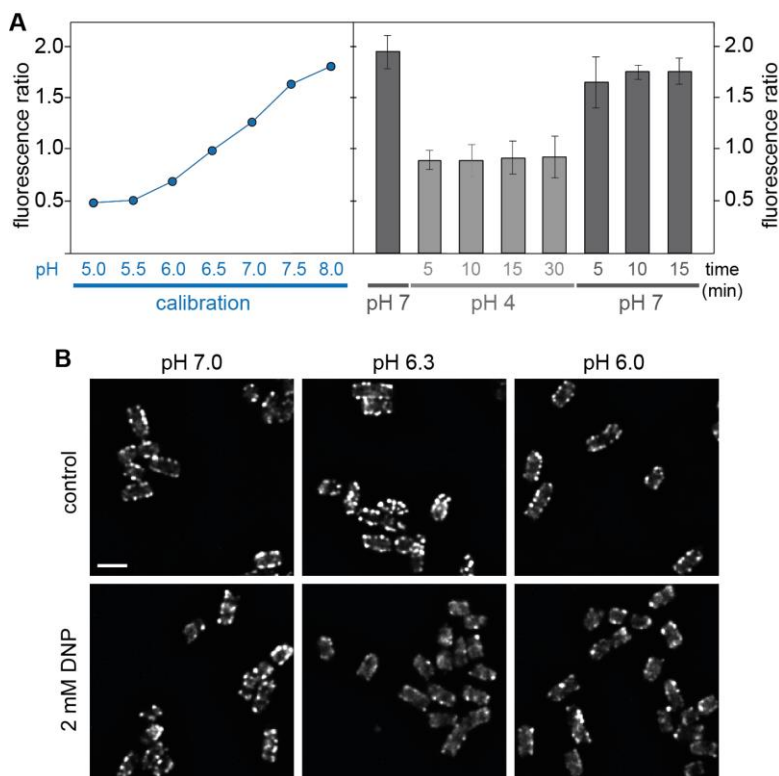

**Fig. 3 – Low external pH leads to a small drop in cytosolic pH, which does not induce the dissociation of cytosolic T3SS components**

(A) Left, calibration of ( $EX_{390nm} / EX_{475nm}$ ) fluorescence ratio of purified pHluorin<sub>M153R</sub> for the indicated pH values. Technical triplicate, error bars too small to display. Right, determination of cytosolic pH upon changing the external pH from 7 (first column) to 4 (columns 2-5) and back (columns 6-8). Fluorescence ratio ( $EX_{390nm} / EX_{475nm}$ ) of bacteria expressing cytosolic pHluorin<sub>M153R</sub>.  $n = 4$ , error bars denote standard deviation. (B) Fluorescence distribution of EGFP-SctQ in live *Y. enterocolitica* at indicated external pH in absence (top) or presence (bottom) of the ionophore 2,4-dinitrophenol (DNP). Scale bar, 2  $\mu$ m.

199

200

201

202

203 Based on above results, we searched for a periplasmic pH sensor. An obvious candidate is SctD, a  
204 bitopic IM protein connecting the outer membrane (OM) ring to the cytosolic components (Fig. 1A)  
205 (Hu et al., 2017; Ross and Plano, 2011). Earlier studies showed that lack of SctD, or its inability to bind  
206 to SctC, leads to a similar cytosolic location of SctK/L/N/Q as observed at an external pH of 4 (Fig. 2A)  
207 (Diepold et al., 2017, 2010), and that the cytosolic domains of SctD connect to SctK via specific  
208 interactions (with four SctD binding to one SctK in *Salmonella* SPI-1) (Hu et al., 2017; Tachiyama et al.,  
209 2019). This suggests that structural rearrangements of SctD could easily lead to dissociation of SctK  
210 and, subsequently, all other cytosolic components.

211 When we tested the behavior of SctD at low external pH, we found that at pH 4, EGFP-SctD foci in the  
212 membrane became less intense than at pH 7, with a concomitant increase in fluorescence throughout  
213 the membrane. In contrast to the cytosolic components however, the SctD foci did not completely  
214 disappear. Importantly, like the cytosolic components, SctD recovered its localization in foci at neutral  
215 external pH (Fig. 4A). To study this unique phenotype in more detail, we performed single-molecule  
216 tracking of PAmCherry-SctD proteins in photoactivated localization microscopy (PALM). These

217 experiments revealed that at an external pH of 7, more than 90% of the SctD molecules in the IM were  
 218 static; by contrast, at an external pH of 4, more than 40% of the SctD molecules became mobile within  
 219 the membrane (Fig. 4B, Suppl. Fig. 8), indicating a dissociation from the core injectosome structure at  
 220 low external pH. Indeed, the large T3SS export apparatus component SctV-EGFP, which diffuses  
 221 throughout the membrane in the absence of SctD (Diepold *et al.*, 2011), displayed the same behavior  
 222 at pH 4 compared to pH 7 (Fig. 4C), in line with a release from the SctD structure.  
 223

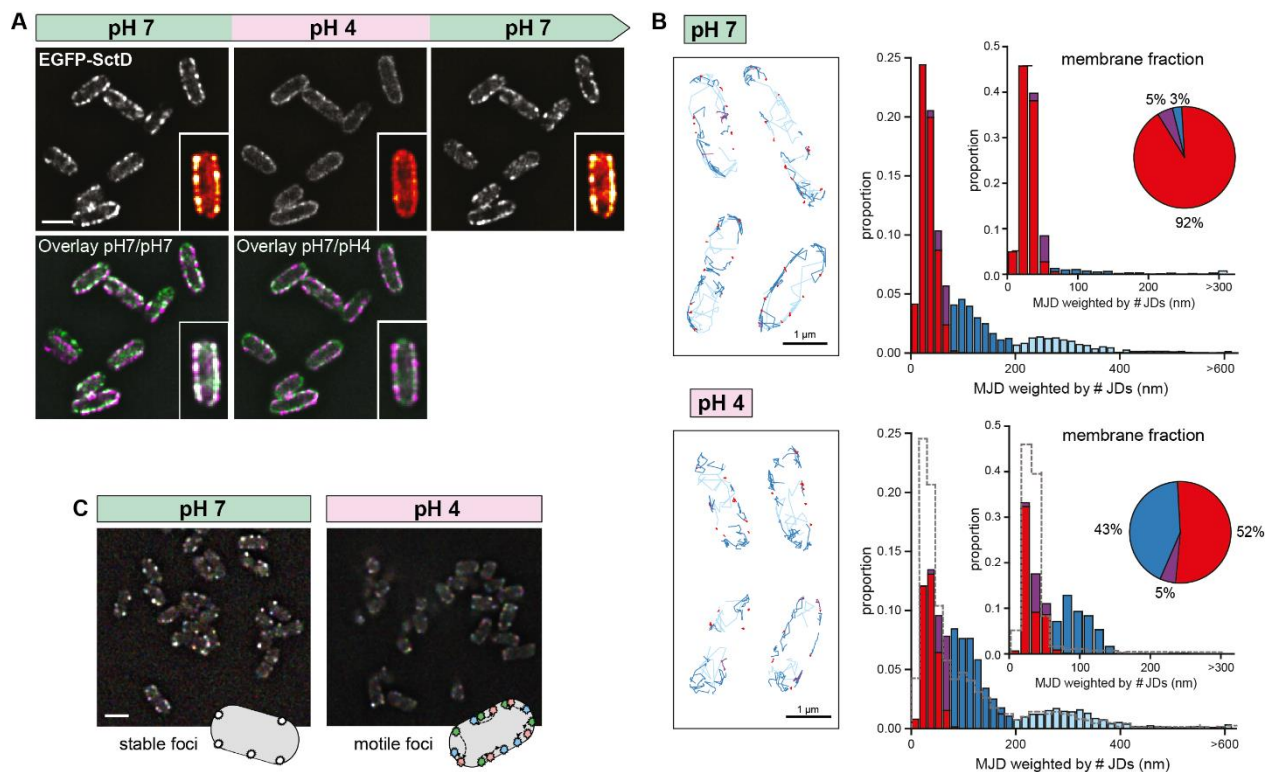

224

225 **Fig. 4 – The bitopic IM protein SctD senses low external pH**

226 (A) Fluorescent micrographs of EGFP-SctD in live *Y. enterocolitica*, consecutively subjected to different external  
 227 pH in a flow cell. Images were taken under secreting conditions, 10 minutes after bacteria were subjected to  
 228 the indicated pH. Insets, enlarged single bacteria, visualized with the ImageJ red-hot color scale. Bottom,  
 229 overlays of fluorescence at pH 7 before pH change (magenta) and pH 7 after pH change or pH 4 (green).  
 230 (B) PAmCherry-SctD dynamics in exemplary living *Y. enterocolitica* (left) and histograms (right) of the mean  
 231 jump distances (MJD) of PAmCherry-SctD trajectories weighted by the number of jump distances (# JDs) used  
 232 for calculating each MJD. Only trajectories with more than 6 one-frame jumps are shown and included into the  
 233 analysis. Upper panel was measured at pH 7, lower panel at pH 4. Trajectories are assigned into two diffusive  
 234 states: static (red) and mobile (violet and blue fractions) based on the experimental localization precision. The  
 235 mobile trajectories are sorted into three MJD categories: lower than 60 nm (violet), lower than 195 nm (dark  
 236 blue) and higher than 195 nm (light blue). Counts are normalized to the total number of trajectories: At pH 7

237 we acquired 29,859 trajectories (60% static, 2% mobile below 60 nm MJD, 25% mobile from 60 to 195 nm MJD,  
238 13% mobile faster than 195 nm MJD; 19,473 membrane-bound trajectories). At pH 4 we acquired 33,036  
239 trajectories (34% static, 4% mobile below 60 nm MJD, 44% mobile from 60 to 195 nm MJD, 18% mobile faster  
240 than 195 nm MJD; 21,600 membrane-bound trajectories). The bin size of 15 nm was calculated using the  
241 Freedman-Diaconis rule. The inset histograms display the statistics of only membrane-bound trajectories. Pie  
242 plots display the percentage of each MJD category to the total number of membrane-bound trajectories. The  
243 number of trajectories of membrane-bound static PAmCherry-SctD molecules decreases in pH 4 (92% to 52%),  
244 while the number of diffusing PAmCherry-SctD with MJDs lower than 195 nm (dark blue bars) increases (3% to  
245 43%). The fast fractions of PAmCherry-SctD molecules of MJDs higher than 195 nm (light blue) which are only  
246 visible for the whole cell analysis remain constant. The grey dashed lines in the pH 4 panels represent the  
247 outlines of the pH 7 analysis. (C) Spatial stability of SctV-EGFP foci over time at the indicated external pH. Three  
248 images of the same focal plane were taken at 10 s intervals. The green channel shows the cell at  $t = 0$  s, the blue  
249 channel at  $t = 10$  s, and the red channel at  $t = 20$  s. Scale bars, 2  $\mu$ m.

250

#### 251 Physiological advantage of temporary suppression of type III secretion at low pH

252 We reasoned that bacteria could benefit from the dissociation of the cytosolic T3SS components at  
253 low external pH to suppress secretion in the stomach, where pH values of 4 and below prevail, which  
254 might lead to energy depletion or even elicit immune reactions. If this would indeed be the case,  
255 bacteria that do not pass through the stomach during normal infection, and therefore are not under  
256 evolutionary pressure to suppress T3SS activity at low pH, might not display the same pH dependence  
257 for T3SS activity. We therefore tested the localization of SctQ in *Pseudomonas aeruginosa*. The T3SS  
258 of *Y. enterocolitica* and *P. aeruginosa* are closely related evolutionarily (Abby and Rocha, 2012), but  
259 the infection strategies of the two species differ. *P. aeruginosa* is not a gastrointestinal pathogen and  
260 mainly enters the host body through wounds. SctQ is similar in the two organisms (41% identity, 59%  
261 similarity across the complete protein; Suppl. Fig. 9A). In agreement with our hypothesis, the fraction  
262 of *P. aeruginosa* cells with EGFP-SctQ foci did not decrease at pH 4 (Fig. 5).

263

264

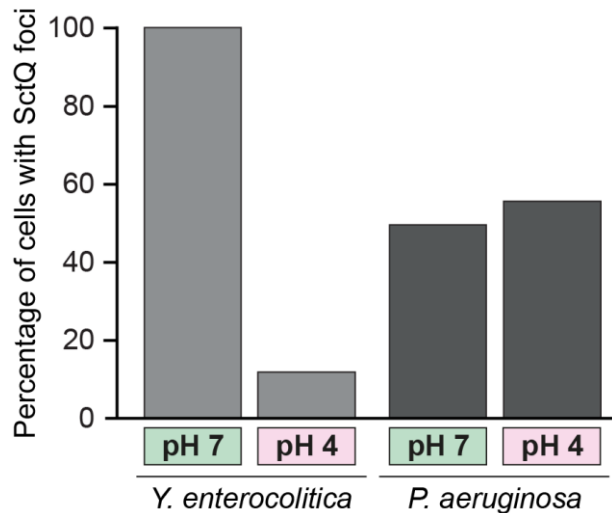

**Fig. 5 – The effect of external pH on the assembly of cytosolic T3SS components is species-specific.**

Percentage of bacteria with EGFP-SctQ foci at the indicated external pH in *Yersinia enterocolitica* and *Pseudomonas aeruginosa*, respectively.  $n = 246, 472, 155, 182$  bacteria from at least 10 fields of view per condition.

273 To determine a potential molecular mechanism for this effect, we identified amino acids in the  
274 periplasmic domain of SctD that could be protonated at pH 4, but not at pH 7 (Asp, Glu, His), and  
275 focused on the subset of these amino acids that differ between *Y. enterocolitica* and *P. aeruginosa*  
276 (Suppl. Fig. 9B). Single amino acid substitutions, as well as the combination of all four substitutions  
277 still led to dissociation of the cytosolic component SctQ, as well as a loss of secretion at pH 4 (Suppl.  
278 Fig. 10) suggesting that the effect of the pH might not be conveyed by discrete salt bridges.

279 After the passage of the stomach, bacteria arrive in the pH-neutral intestine, where they pass the M  
280 cells across the intestinal epithelium. At this point, the injectisome must be ready to manipulate  
281 immune cells. To test whether the reversible dissociation of the cytosolic T3SS components supports  
282 a fast activation of the T3SS once back at neutral pH, we monitored the secretion of effectors over  
283 time after a temporary drop of external pH to 4. We found that effector secretion was suppressed at  
284 low pH, but recovered within 20-40 minutes after reaching neutral pH (Fig. 6A). Notably, the recovery  
285 is much faster than the onset of effector secretion after *de novo* assembly of the T3SS by a  
286 temperature change to 37°C (Fig. 6A), supporting the notion that bacteria benefit from the temporary  
287 dissociation of the cytosolic subunits at low pH in two ways: This mechanism suppresses protein  
288 secretion at low external pH, while ensuring a fast reactivation upon reaching a pH-neutral  
289 environment (Fig. 6B).

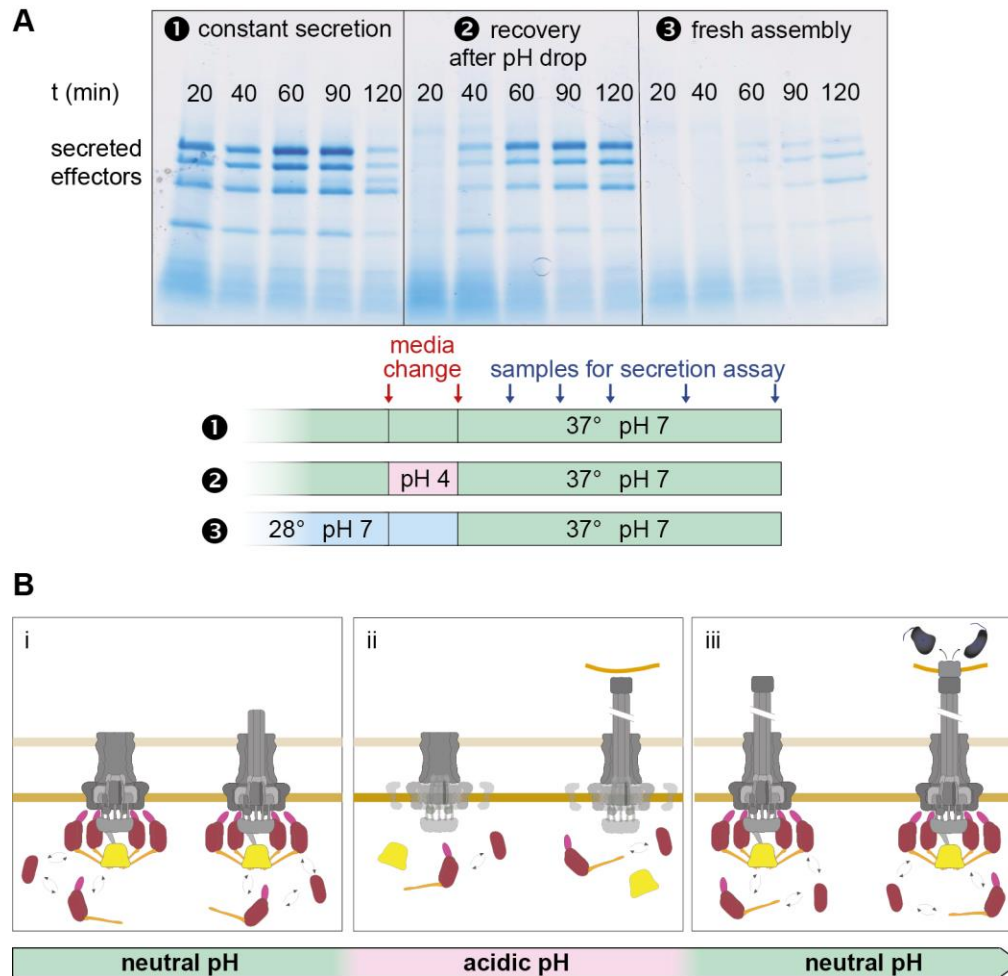

290

291 **Fig. 6 – Temporary suppression of T3SS activity at low external pH enables a fast re-activation of secretion**

292 (A) *In vitro* secretion assay showing the effectors exported by the T3SS at the given time points after the second  
293 media change, (1) under constantly secretion-inducing conditions, (2) after a temporary change of the external  
294 pH to 4, (3) after incubation at 28°C, where no injectisomes are assembled. (B) Model of the pH-dependent  
295 suppression of T3SS activity. From left to right: (i) Assembly of the T3SS upon entry into host organisms;  
296 cytosolic components bound and exchanging with cytosolic pool. (ii) Continued assembly in the stomach, but  
297 no effector translocation upon host cell attachment, because cytosolic components are exclusively cytosolic.  
298 (iii) Re-association of cytosolic components to the injectisome and effector translocation upon host cell contact  
299 in neutral body parts.

300

### 301 Discussion

302 On their way through the gastrointestinal system, bacteria encounter a multitude of different pH  
303 environments. Importantly, the highly acidic stomach acts as natural barrier for food-borne infections.  
304 Gastrointestinal pathogens like *Y. enterocolitica* express factors that facilitate survival in these

305 conditions, most prominently urease, of which high amounts are exported (Chen et al., 2016; Heroven  
306 and Dersch, 2014; Hu et al., 2009; Stingl and De Reuse, 2005; Young et al., 1996). It was not known,  
307 however, if and how the activity of the T3SS, an essential virulence factor for many gastrointestinal  
308 pathogens, is regulated under these conditions. Although the target cells of the *Y. enterocolitica* T3SS  
309 are downstream of the stomach, bacteria can attach to host cells at low pH (Fig. 1B, Suppl. Movies 1-  
310 2). Our data support the notion that bacteria prevent premature injection into host cells at this stage  
311 by directly using the external pH as a cue for the temporary suppression of the T3SS. While parts of  
312 the T3SS, including the needle, remain stable, the cytosolic components dissociate from the  
313 injectisome in an acidic environment (pH 4 and below). This effect persists at low external pH;  
314 however, once the bacteria encounter neutral external pH, both adherence via the adhesin YadA to  
315 collagen is significantly increased (Fig. 1D), and the binding of the cytosolic components is restored  
316 (Fig. 2). Bacteria conceivably benefit from this mechanism, which prevents the premature effector  
317 translocation into any eukaryotic cells in contact in the acidic regions of the stomach, an event that  
318 would be energetically expensive and might elicit immune responses. Secretion can be restored within  
319 20-40 minutes, once the pH-neutral intestine is reached, which is significantly faster than *de novo*  
320 synthesis of injectisomes at this time (Fig. 6).

321 The dissociation kinetics of the cytosolic components of the T3SS revealed a dissociation half-time of  
322 about one to two minutes under secreting conditions (Fig. 2D, Suppl. Movie 3). This value is strikingly  
323 similar to the exchange rate of SctQ at the injectisome (Diepold et al., 2015), suggesting that at low  
324 external pH, primarily the re-association of the cytosolic components is prevented. This adaptation of  
325 T3SS function may explain the so-far enigmatic benefit of the observed dynamics of the cytosolic parts  
326 of the injectisome during its function. Notably, the observed dissociation of the cytosolic proteins in  
327 response to low external pH may not reveal the complete mechanism for suppression of T3SS activity  
328 at this pH. The observation that the dissociation of the cytosolic components occurs at a slightly lower  
329 pH than the loss of effector secretion, and that the re-initiation of secretion occurs later than the  
330 initial recovery of foci indicates that other factors, such as conformational changes in SctD or the  
331 cytosolic components might participate in this phenotype. The slightly delayed activation of secretion  
332 after restoration of neutral pH could also be explained by the time required for re-associating SctV to  
333 the machinery. This delay may, in fact, be beneficial for *Y. enterocolitica*, as it delays the  
334 antiphagocytic effects of the T3SS effectors, which otherwise may hamper the passage of *Y.*



335 *enterocolitica* through the M cells that is required to access the lymphoid follicles of the Peyer's  
336 patches (Cornelis, 2002).

337 We found that similarly to *E. coli* (Krulwich *et al.*, 2011; Slonczewski *et al.*, 1981), *Y. enterocolitica* can  
338 partially compensate for acidic external environment, and that at an external pH of 4.0, the cytosolic  
339 pH remained at 6.3-6.4 (Fig. 3A). When we used a proton ionophore to create this cytosolic pH at a  
340 similar external pH, the cytosolic T3SS components remained bound to the injectisome (Fig. 3B),  
341 suggesting that the external pH is sensed outside the bacterial cytosol. A prime candidate to be  
342 involved in external pH sensing is the bitopic IM component SctD, which conceivably senses a drop in  
343 external pH with its periplasmic domain and then transmits this signal to the cytosol, either by a direct  
344 structural change or by a rearrangement of its interaction within the 24-mer IM ring structure. Both  
345 types of pH sensing are used by biological systems: The *E. coli* membrane-integrated transcriptional  
346 regulator CadC senses acidic pH through direct protonation of a charged surface patch in its C-terminal  
347 periplasmic domain, and transduces the signal to the cytosol by its N-terminal cytosolic domain  
348 (Haneburger *et al.*, 2011). Similarly, the *P. syringae* T3SS effector AvrPto transitions from a largely  
349 unfolded state in the mildly acidic bacterial cytosol to a well-defined fold in the neutral host cytosol  
350 (Dawson *et al.*, 2009). Perhaps most strikingly, the highly ordered multimeric structures of  
351 bacteriophages undergo large-scale structural changes at low pH, that are reversible (Helenius *et al.*,  
352 1980; Mauracher *et al.*, 1991; Taylor *et al.*, 2002). Indeed, our data indicate a reversible partial  
353 delocalization of SctD at low external pH (Fig. 4). The presence of SctD is required for binding of any  
354 cytosolic T3SS component (Diepold *et al.*, 2017, 2010), most likely through a direct contact of four  
355 SctD to one SctK at the cytosolic interface of the IM (Hu *et al.*, 2017), indicating that this partial  
356 displacement of SctD (Fig. 4) is causal for the dissociation of the cytosolic T3SS components.

357 Interestingly, SctD is one of the least conserved genes in the T3SS, especially in comparison to its  
358 direct structural neighbors, the highly conserved SctC secretin ring in the OM, as well as SctJ and the  
359 export apparatus proteins in the IM (Diepold and Wagner, 2014). While this low sequence similarity  
360 prevented a multi-sequence alignment to identify conserved differences between the T3SS of  
361 gastrointestinal and non-gastrointestinal pathogens (except for the closely related *Y. enterocolitica*  
362 and *P. aeruginosa*, Suppl. Fig. 9B), it supports the notion that SctD is involved in species-specific  
363 adaptation of the T3SS, such as pH sensing. This hypothesis is further substantiated by the finding that  
364 in *P. aeruginosa*, which does not pass the stomach during a normal infection, the effect of low pH is

365 significantly restricted, with the majority of EGFP-SctQ foci remaining present at low external pH  
366 (Fig. 5).

367 Like the *Y. enterocolitica* T3SS, the intracellular *Salmonella enterica* SPI-2 T3SS is strongly influenced  
368 by the external pH; however, the mechanism described for SPI-2 differs from the one described in this  
369 study. Injectisome assembly and secretion of the translocon components in SPI-2 are activated by the  
370 low pH of the surrounding vacuole (around pH 5.0). After this step, neutral pH, most likely indicative  
371 of a successfully established connection to the neutral host cytosol, leads to the disassembly of a  
372 gatekeeper complex, which in turn licenses the translocation of effectors (Yu et al., 2010). Strikingly,  
373 a single amino acid exchange in the export apparatus protein SctV governs this pH-dependent effect  
374 (Yu et al., 2018). Both the sensory and the functional connection between the pH and T3SS activity  
375 differ between *Salmonella* SPI-2 and *Y. enterocolitica*, which highlights the high degree of functional  
376 adaptability of the T3SS. Taken together, these observations showcase the variety and sophistication  
377 of mechanisms that gastrointestinal pathogens have evolved to use different aspects of T3SS  
378 assembly and function, including protein dynamics, to tailor the activity of this essential virulence  
379 mechanism to their specific needs during infection.

380

## 381 Material and Methods

### 382 *Bacterial strain generation and genetic constructs*

383 A list of strains and plasmids used in this study can be found in [Supplementary Table 1](#). The strains  
384 used in this study are based on the *Y. enterocolitica* wild-type strain MRS40 (Sory et al., 1995), and  
385 the strain IML421asd ( $\Delta$ HOPEMTasd), in which all major virulence effector proteins (YopH,O,P,E,M,T)  
386 are deleted (Kudryashev et al., 2013). Furthermore, this strain harbors a deletion of the aspartate-  
387 beta-semialdehyde dehydrogenase gene which render the strain auxotrophic for diaminopimelic acid  
388 (DAP).

389 All fusion proteins used were expressed as endogenous fusions from their native location on the pYV  
390 virulence plasmid, which were introduced by two step homologous recombination (Kaniga et al.,  
391 1991).

392 For cloning and conjugation the *E. coli* strains Top10 and SM10  $\lambda$ pir were used, respectively. All  
393 constructs were confirmed by sequencing (Eurofins Scientific). Constructs with single amino acid

394 substitutions in SctD were created by overlapping PCR using Phusion polymerase (New England  
395 Biolabs), and expressed from an arabinose controlled expression vector (pBAD). Expression was  
396 induced by addition of 0.2-0.4% arabinose (as indicated) at the time of the induction of T3SS  
397 expression (temperature increase to 37°C).

398 *Bacterial cultivation, in vitro secretion assays and fluorescence microscopy*

399 *Y. enterocolitica* day cultures were inoculated from stationary overnight cultures to an OD<sub>600</sub> of 0.15  
400 and 0.12 for secreting and non-secreting conditions, respectively, in BHI medium (Suppl. Table 2)  
401 supplemented with nalidixic acid (35 mg/ml), diaminopimelic acid (80 mg/ml), where required,  
402 glycerol (0.4%) and MgCl<sub>2</sub> (20 mM). Where required, ampicillin was added (0.2 mg/ml) to select for  
403 pBAD-based plasmids. For secreting conditions, cultures were additionally supplemented with 5 mM  
404 EGTA; for non-secreting conditions, cultures were additionally supplemented with 5 mM CaCl<sub>2</sub> and  
405 filtered through a 0.45 µm filter. Cultures were incubated at 28°C for 90 minutes. At this time point,  
406 expression of the *yop* regulon was induced by a rapid temperature shift to 37°C in a water bath for 2-  
407 3 h. At the temperature upshifts, pBAD-based genes were induced by addition of 0.2-0.4% arabinose  
408 (as indicated).

409 For effector visualization or total cell analysis, the cells were incubated at 37°C between 1-3 hours, as  
410 described. Then, 2 ml of the culture were collected at 21,000 *g* for 10 min. The supernatant was  
411 separated from the cell fraction and precipitated with trichloroacetic acid (TCA) for 1-8 h at 4°C.  
412 Proteins were collected by centrifugation for 20 min at 21,000 *g* and 4°C, washed once with ice cold  
413 acetone and then resuspended and normalized in SDS-PAGE loading buffer. Total cell samples were  
414 normalized to 2.5x10<sup>8</sup> bacteria in SDS loading. Afterwards the samples were incubated for 5 minutes  
415 at 99°C and loaded on 12-20% SDS-PAGE gels and stained after running with Instant blue (Expedeon).

416 For fluorescence microscopy, bacteria were grown at 37°C. After 2-3 h, 400 µl of bacterial culture  
417 were collected by centrifugation (2,400 *g*, 2 min) and resuspended in 200µl microscopy minimal  
418 medium (Suppl. Table 2). Cells were spotted on glass depression slides on 1.5% low melting agarose  
419 pads (Sigma) in microscopy minimal medium. Where required, 80 mg/ml DAP for ΔHOPEMTasd-based  
420 strains, 0.2-0.4% L-arabinose for induction of *in trans* expression, 5 mM Ca<sup>2+</sup> for non-secreting  
421 conditions, or 5 mM EGTA for secreting conditions were added.

422 *P. aeruginosa* overnight cultures were grown at 28°C. For secreting cultures, LB broth (Suppl. Table 2)  
423 was supplemented with 20 mM MgCl<sub>2</sub>, 200mM NaCl and 5 mM EGTA and inoculated to an OD<sub>600</sub> of

424 0.15 and incubated for 2 h at 37°C. This culture was then used to inoculate a fresh culture containing  
425 the same supplements to an OD<sub>600</sub> of 0.15. Microscopy experiments were then performed 2 h later  
426 on a minimal media agar pad and in LB medium.

#### 427 *Wide field fluorescence microscopy*

428 Microscopy was performed on a Deltavision Elite Spectris Optical Sectioning Microscope (Applied  
429 Precision), equipped with a UApo N 100x/1.49 oil TIRF UIS2 objective (Olympus), using an Evolve  
430 EMCCD Camera (Photometrics). The sample was illuminated for 0.1 s with a 488 laser with a TIRF depth  
431 setting of 3440. The micrographs were then deconvolved using softWoRx 7.0.0 (standard  
432 “conservative” settings). Images were then further processed for presentation with ImageJ-Fiji.  
433 Where necessary, drift correction was performed with the StackReg Plugin. A representative field of  
434 view was selected, brightness and contrast of the micrographs was adjusted to the same level and  
435 false colors selected.

436 Samples sizes and number of replicates for wide field microscopy and all other experiments were  
437 determined prior to the experiments, based on experimental feasibility and their potential to draw  
438 clear conclusions. These numbers were not changed based on the experimental outcome.

#### 439 *Flow cell based TIRF microscopy*

440 A microscopy flow cell was manufactured based on (Berg and Block, 1984). Formation of injectisomes  
441 was induced under non-secreting conditions. After formation of the injectisomes, bacteria were  
442 collected and resuspended in approximately 0.5 volumes of microscopy medium supplemented with  
443 80 mg/ml DAP and 5mM EGTA. The flow cell was pre-incubated with microscopy medium and the  
444 bottom coverslip (25 mm No. 1.5; VWR) was attached to the cell. Bacteria were spotted on a coverslip  
445 and incubated on the coverslip for 1 min to insure attachment to the glass surface. In a next step the  
446 flow cell was flooded with 60 µl of minimal media and sealed from the top with an additional cover  
447 slip. The flow cell was mounted on the microscopy stage and buffer flow in the chamber by gravity-  
448 driven flow was induced using a 1 ml syringe. To exchange the buffers in the flow cell, the tube was  
449 quickly relocated to the new buffer. Complete buffer exchange in the flow cell was determined to  
450 take  $39 \pm 5$  s ( $n = 7$ ).

#### 451 *Detection and quantification of fluorescent foci*

452 Quantitative foci detection was performed by first segmenting the images using the software  
453 BiofilmQ. After segmentation, we extended the functionality of the fluorescence property calculations  
454 within BiofilmQ, by detecting the characteristics of fluorescence foci. The foci were filtered by their  
455 intensity above the background intensity of the cell, calculated by subtracting a blurred image.

#### 456 *Maleimide based needle staining*

457 To visualize the injectisome needles, expression of SctF<sub>SSC</sub> (Milne-Davies et al., 2019) was induced from  
458 plasmid. Protein expression was induced with 0.4% L-arabinose at the temperature shift. After 2-3 h,  
459 bacteria were collected and resuspended in 0.2 volumes of microscopy medium supplemented with  
460 5  $\mu$ M of a CF<sup>TM</sup>488A/633 maleimide dye (Sigma-Aldrich, USA) for 5 min in 100  $\mu$ l of minimal media at  
461 37°C. After staining, cells were washed once with 500 $\mu$ l of minimal medium and spotted on 1.5%  
462 agarose pads in the same medium.

#### 463 *Halo staining with Janelia fluorescent dyes*

464 To stain and visualize a defined pool of T3SS proteins, Halo-labeled proteins were visualized using  
465 Janelia Fluor 549-NHS ester and Janelia Fluor 646-NHS ester. 500  $\mu$ l of bacterial culture were collected  
466 by centrifugation (2,400 *g*, 2 min) and resuspended in 100  $\mu$ l microscopy medium. Bacteria were  
467 stained with 0.2  $\mu$ M Janelia Fluor JF-646/JF-549 dyes for 37°C for 30 min in a tabletop shaker.  
468 Afterwards, bacteria were washed twice in 500  $\mu$ l minimal medium and then mounted on the flow  
469 cell or 1.5% agarose pads in the same medium.

#### 470 *Equilibration of cytosolic and external pH*

471 2,4-dinitrophenol (DNP) was diluted in methanol and used in a final concentration of 2 mM in  
472 microscopy minimal media. Cells were grown under the conditions described above, and resuspended  
473 in DNP containing media immediately before being spotted on 1.5% agarose pads in the same  
474 medium.

#### 475 *Bacterial survival test*

476 Wild-type MRS40 *Y. enterocolitica* were inoculated to an OD<sub>600</sub> of 0.12 in non-secreting conditions and  
477 incubated for 1.5 h at 28°C to reach exponential growth phase. Then cells were collected by  
478 centrifugation at 2,400 *g* for 2 min. The supernatant was discarded and the pellets were resuspended  
479 in a range of pH-adjusted media buffered with 50 mM glycine, 50 mM HEPES and 50 mM MES. These  
480 cultures were incubated for 15 min at 28°C and afterwards a dilution series in neutral media was

481 performed. For the visualization, 4  $\mu$ l of bacterial suspension were spotted on a neutral LB agar  
482 supplemented with nalidixic acid and incubated at 28°C overnight.

#### 483 *pHluorin purification and calibration*

484 For purification, the protocol described by Nakamura *et al.* (Nakamura *et al.*, 2009) was adapted for  
485 bench top purification. Expression of ratiometric GST-pHluorin<sub>M153R</sub> in *E. coli* DH5 $\alpha$ ZI was induced in a  
486 500 ml culture with 1 mM IPTG, followed by 4 h incubated at 28°C. Cells were harvested and stored  
487 for further processing at -80°C. Next, cells were thawed on ice, resuspended in lysis buffer and  
488 disrupted by two passages through a French Press. The lysate was centrifuged (25,000 rpm, 60 min,  
489 4°C) and then mixed with the previously equilibrated glutathione agarose and gently mixed at 4°C for  
490 1.5 h in a small spinning wheel. The agarose was collected by centrifugation (500 *g*, 5 min) and washed  
491 3 times with PBS. Thrombin digest was performed in 2 ml PBS while incubating for 60 min on a roll  
492 mill. Agarose was removed by centrifugation (500 *g*, 5 min) and the protein was stored at -80°C for  
493 further use.

494 The calibration was performed on a Deltavision Elite microscope. 5  $\mu$ l of purified pHluorin protein was  
495 spotted on a KOH-cleaned microscopy slide in an enclosed compartment (Thermo Fisher Scientific  
496 GeneFrame, AB-0577) and incubated for 5 min to ensure attachment to the glass surface. Then, 10  $\mu$ l  
497 of pH-adjusted PBS buffered with 200 mM glycine, 200 mM HEPES, and 200 mM MES were added.  
498 Ratiometric pHluorin fluorescence was determined using the DAPI excitation filter (390/18nm) or GFP  
499 excitation filter (475/28nm) at 32% illumination intensity, in combination with a GFP emission filter  
500 set (525/48nm) with 0.3 s exposure time. The overall fluorescence of the images before deconvolution  
501 were determined and corrected for background, which was measured with an empty slide filled with  
502 PBS. The ratio of DAPI/Green vs Green/Green fluorescence was determined for a pH range from pH 8  
503 – pH 5 in 0.5 pH steps.

#### 504 *Single particle tracking photoactivated localization microscopy (sptPALM)*

505 Bacteria were cultivated under non-secreting conditions as described above. After 2.5 h of incubation  
506 at 37°C, the media was changed to pre warmed (37°C) minimal microscopy medium containing the  
507 same supplements as the BHI before. Cells were incubated for 30 min and then washed four times in  
508 5 volumes of pre-warmed (37°C) EZ medium (Supplementary Table 2) supplemented with DAP and 5  
509 mM CaCl<sub>2</sub>. Bacteria were concentrated 2x after the last wash and spotted on a 1.5% agarose pad in  
510 EZ medium supplemented with DAP and 5 mM CaCl<sub>2</sub> on a KOH-cleaned microscopy slide in an

511 enclosed compartment (Thermo Fisher Scientific GeneFrame, AB-0577). Imaging was performed on a  
512 custom build setup based on an automated Nikon Ti Eclipse microscope equipped with appropriate  
513 dichroic and filters (ET DAPI/FITC/Cy3 dichroic, ZT405/488/561rpc rejection filter, ET610/75  
514 bandpass, Chroma), and a CFI Apo TIRF 100x oil objective (NA 1.49, Nikon). All lasers (405 nm OBIS,  
515 561 nm OBIS; all Coherent Inc. USA) were modulated via an acousto-optical tunable filter (AOTF)  
516 (Gooch and Housego, USA). Fluorescence was detected by an EMCCD camera (iXON Ultra 888, Andor,  
517 UK) in frame transfer mode and read-out parameter settings of EM-gain 300, pre-amp gain 2 and 30  
518 MHz read-out speed. The z-focus was controlled using a commercial perfect focus system (Nikon).  
519 Acquisitions were controlled by a customized version of Micro-Manager (Edelstein et al., 2010). Live  
520 cell sptPALM experiments were performed on a customized heating stage at 25°C. Live *Y.*  
521 *enterocolitica* PAmCherry-SctD cells were imaged in HILO illumination mode (Tokunaga et al., 2008).  
522 Applied laser intensities measured after objective were 35 W/cm<sup>2</sup> (405 nm) and 800 W/cm<sup>2</sup> (561 nm).  
523 Prior to recording each new region of interest (ROI), a pre-bleaching step of 561 nm illumination was  
524 applied for 30 seconds to reduce autofluorescence. Movies were then recorded for 2000 frames  
525 pulsing the 405 nm laser every 20<sup>th</sup> imaging frame at 5 Hz with an exposure time of 200 ms per frame.  
526 After sptPALM imaging, a bright light snapshot of all illuminated regions was recorded to obtain the  
527 bacterial cell shapes.

528 Single molecule localizations were obtained using *rapidSTORM* 3.3.1 (Wolter et al., 2012) and single  
529 cells were manually segmented in *Fiji (ImageJ 1.51f)* (Schindelin et al., 2012). sptPALM data was  
530 tracked, visualized and filtered using a customized tracking software written in C++ (*swift*,  
531 unpublished software, RG Endesfelder). Trajectories were allowed to have a maximum of 5 frames of  
532 gap time (e.g. caused by fluorophore blinking). Trajectories were assigned to their diffusive states  
533 (static and mobile) on the basis of the experimental localization precision of about 25 nm (determined  
534 by the NeNA method (Endesfelder et al., 2014). For trajectories with more than 6 one-frame jumps,  
535 the mean jump distance (MJD) was calculated (jumps spanning several frames due to dark times were  
536 not used in MJD calculations). The obtained MJDs were weighted by the number of jumps and  
537 displayed in a histogram using OriginPro 9.4 (Origin LAB Corporation, USA).

### 538 *Y. enterocolitica* YadA and cellular adhesion assays

539 To measure YadA adhesion to collagen at different pH values, an ELISA-like binding assay was  
540 performed (Leo et al., 2010, 2008; Saragliadis and Linke, 2019). Clear 96 well plates (Sarstedt, Ref.  
541 82.1581) were coated with 100 µl of calf collagen type I (10 µg/ml, ThermoFisher A1064401) in H<sub>2</sub>O

542 with 0.01 M acetic acid for 1h at room temperature (RT). The supernatant was discarded and the wells  
543 were blocked with 1% BSA in PBS and afterwards washed three times with 0.1% BSA in PBS.  
544 Afterwards, 100  $\mu$ L of purified YadA head domains with a C-terminal His<sub>6</sub>-tag at a concentration of 10  
545  $\mu$ g/mL were incubated in the wells. In order to test binding at different pH, the YadA heads were  
546 diluted in acetic acid/sodium acetate at pH 4.0 or pH 5.0 and for higher pH values in PBS at pH 6.0 and  
547 7.0. Binding was allowed for 1 h at RT. Afterwards, the plate was emptied and washed three times  
548 with 0.1% BSA in PBS. The wells were blocked with 1.0% BSA in PBS for 1h at RT. For detection, Ni-  
549 HRP conjugates (HisProbe-HRP, Thermo Fisher Scientific, Ref. 15165) were diluted in 0.1% BSA in PBS  
550 and 100  $\mu$ l per well were incubated for 1 h at RT. The Ni-HRP conjugate solution was discarded and  
551 the wells washed three times with PBS. Detection was performed using ABTS substrate (Thermo  
552 Scientific, Ref. 34026). Development was allowed for 30 min. Absorption was measured at 405 nm on  
553 a plate reader (Biotek Synergy H1).

554 Glass binding assays for live *Y. enterocolitica* were performed in a flow cell. Bacteria were treated as  
555 mentioned above, resuspended in microscopy medium at the indicated pH value, and added to the  
556 flow cell as described above. Bacteria were tracked visually for 10 min afterwards.

557

#### 558 Acknowledgements

559 We thank Marc Erhardt (Humboldt University Berlin, Germany), Tohru Minamino (Osaka University,  
560 Japan), and Gero Miesenböck (University of Oxford, UK) for the pHluorin<sub>M153R</sub> DNA, and Luke Lavis  
561 (Janelia Research Campus, USA) for the kind gift of Janelia Fluor dyes.

562 This work was supported by the Max Planck Society. It was also funded by the Horizon 2020 Innovative  
563 Training Network “ViBrANT” (to DL).

564

#### 565 References

- 566 Abby SS, Rocha EPC. 2012. The non-flagellar type III secretion system evolved from the bacterial  
567 flagellum and diversified into host-cell adapted systems. *PLoS Genet* **8**:e1002983.  
568 doi:10.1371/journal.pgen.1002983
- 569 Berg HC, Block SM. 1984. A Miniature Flow Cell Designed for Rapid Exchange of Media Under High-  
570 power Microscope Objectives. *Microbiology* **130**:2915–2920. doi:10.1099/00221287-130-11-2915
- 571 Bernal I, Börnicke J, Heidemann J, Svergun D, Horstmann JA, Erhardt M, Tuukkanen A, Uetrecht C,  
572 Kolbe M. 2019. Molecular Organization of Soluble Type III Secretion System Sorting Platform  
573 Complexes. *J Mol Biol* **431**:3787–3803. doi:10.1016/j.jmb.2019.07.004



- 574 Büttner D. 2012. Protein export according to schedule: architecture, assembly, and regulation of type  
575 III secretion systems from plant- and animal-pathogenic bacteria. *Microbiol Mol Biol Rev* **76**:262–  
576 310. doi:10.1128/MMBR.05017-11
- 577 Chen S, Thompson KM, Francis MS. 2016. Environmental Regulation of Yersinia Pathophysiology.  
578 *Front Cell Infect Microbiol* **6**:25. doi:10.3389/fcimb.2016.00025
- 579 Clerc P, Baudry B, Sansonetti PJ. 1986. Plasmid-mediated contact haemolytic activity in Shigella  
580 species: correlation with penetration into HeLa cells. *Ann Inst Pasteur Microbiol* **137A**:267–78.
- 581 Coburn B, Sekirov I, Finlay BB. 2007. Type III secretion systems and disease. *Clin Microbiol Rev* **20**:535–  
582 49. doi:10.1128/CMR.00013-07
- 583 Cornelis GR. 2006. The type III secretion injectisome. *Nat Rev Microbiol* **4**:811–825.  
584 doi:10.1038/nrmicro1526
- 585 Cornelis GR. 2002. Yersinia type III secretion: Send in the effectors. *J Cell Biol* **158**:401–408.  
586 doi:10.1083/jcb.200205077
- 587 Dawson JE, Seckute J, De S, Schueler SA, Oswald AB, Nicholson LK. 2009. Elucidation of a pH-folding  
588 switch in the Pseudomonas syringae effector protein AvrPto. *Proc Natl Acad Sci U S A* **106**:8543–8.  
589 doi:10.1073/pnas.0809138106
- 590 Dechant R, Binda M, Lee SS, Pelet S, Winderickx J, Peter M. 2010. Cytosolic pH is a second messenger  
591 for glucose and regulates the PKA pathway through V-ATPase. *EMBO J* **29**:2515–26.  
592 doi:10.1038/emboj.2010.138
- 593 Diepold A, Amstutz M, Abel S, Sorg I, Jenal U, Cornelis GR. 2010. Deciphering the assembly of the  
594 Yersinia type III secretion injectisome. *EMBO J* **29**:1928–1940. doi:10.1038/emboj.2010.84
- 595 Diepold A, Kudryashev M, Delalez NJ, Berry RM, Armitage JP. 2015. Composition, Formation, and  
596 Regulation of the Cytosolic C-ring, a Dynamic Component of the Type III Secretion Injectisome.  
597 *PLoS Biol* **13**:e1002039. doi:10.1371/journal.pbio.1002039
- 598 Diepold A, Sezgin E, Huseyin M, Mortimer T, Eggeling C, Armitage JP. 2017. A dynamic and adaptive  
599 network of cytosolic interactions governs protein export by the T3SS injectisome. *Nat Commun*  
600 **8**:15940. doi:10.1038/ncomms15940
- 601 Diepold A, Wagner S. 2014. Assembly of the bacterial type III secretion machinery. *FEMS Microbiol*  
602 *Rev* **38**:802–22. doi:10.1111/1574-6976.12061
- 603 Diepold A, Wiesand U, Cornelis GR. 2011. The assembly of the export apparatus (YscR,S,T,U,V) of the  
604 Yersinia type III secretion apparatus occurs independently of other structural components and  
605 involves the formation of an YscV oligomer. *Mol Microbiol* **82**:502–14. doi:10.1111/j.1365-  
606 2958.2011.07830.x
- 607 Edelstein A, Amodaj N, Hoover K, Vale R, Stuurman N. 2010. Computer control of microscopes using  
608  $\mu$ Manager. *Curr Protoc Mol Biol* **Chapter 14**:Unit14.20. doi:10.1002/0471142727.mb1420s92
- 609 Endesfelder U, Malkusch S, Fricke F, Heilemann M. 2014. A simple method to estimate the average  
610 localization precision of a single-molecule localization microscopy experiment. *Histochem Cell Biol*  
611 **141**:629–38. doi:10.1007/s00418-014-1192-3
- 612 Evans DF, Pye G, Bramley R, Clark AG, Dyson TJ, Hardcastle JD. 1988. Measurement of gastrointestinal  
613 pH profiles in normal ambulant human subjects. *Gut* **29**:1035–41. doi:10.1136/gut.29.8.1035
- 614 Grimm JB, Brown TA, English BP, Lionnet T, Lavis LD. 2017. Synthesis of Janelia Fluor HaloTag and

- 615 SNAP-Tag Ligands and Their Use in Cellular Imaging Experiments. *Methods Mol Biol* **1663**:179–188.  
616 doi:10.1007/978-1-4939-7265-4\_15
- 617 Håkansson S, Schesser K, Persson C, Galyov EE, Rosqvist R, Homblé F, Wolf-Watz H. 1996. The YopB  
618 protein of *Yersinia pseudotuberculosis* is essential for the translocation of Yop effector proteins  
619 across the target cell plasma membrane and displays a contact-dependent membrane disrupting  
620 activity. *EMBO J* **15**:5812–5823.
- 621 Haneburger I, Eichinger A, Skerra A, Jung K. 2011. New insights into the signaling mechanism of the  
622 pH-responsive, membrane-integrated transcriptional activator CadC of *Escherichia coli*. *J Biol Chem*  
623 **286**:10681–9. doi:10.1074/jbc.M110.196923
- 624 Helenius A, Kartenbeck J, Simons K, Fries E. 1980. On the entry of Semliki forest virus into BHK-21 cells.  
625 *J Cell Biol* **84**:404–20. doi:10.1083/jcb.84.2.404
- 626 Heroven AK, Dersch P. 2014. Coregulation of host-adapted metabolism and virulence by pathogenic  
627 *Yersinia*. *Front Cell Infect Microbiol* **4**:146. doi:10.3389/fcimb.2014.00146
- 628 Hong JS, Hunt AG, Masters PS, Lieberman MA. 1979. Requirements of acetyl phosphate for the binding  
629 protein-dependent transport systems in *Escherichia coli*. *Proc Natl Acad Sci U S A* **76**:1213–7.  
630 doi:10.1073/pnas.76.3.1213
- 631 Hu B, Lara-Tejero M, Kong Q, Galán JE, Liu J. 2017. In Situ Molecular Architecture of the Salmonella  
632 Type III Secretion Machine. *Cell* **168**:1065–1074.e10. doi:10.1016/j.cell.2017.02.022
- 633 Hu B, Morado DR, Margolin W, Rohde JR, Arizmendi O, Picking WL, Picking WD, Liu J. 2015.  
634 Visualization of the type III secretion sorting platform of *Shigella flexneri*. *Proc Natl Acad Sci*  
635 **112**:1047–1052. doi:10.1073/pnas.1411610112
- 636 Hu Y, Lu P, Wang Y, Ding L, Atkinson S, Chen S. 2009. OmpR positively regulates urease expression to  
637 enhance acid survival of *Yersinia pseudotuberculosis*. *Microbiology* **155**:2522–2531.  
638 doi:10.1099/mic.0.028381-0
- 639 Hueck CJ. 1998. Type III protein secretion systems in bacterial pathogens of animals and plants.  
640 *Microbiol Mol Biol Rev* **62**:379–433.
- 641 Jackson MW, Plano G V. 2000. Interactions between type III secretion apparatus components from  
642 *Yersinia pestis* detected using the yeast two-hybrid system. *FEMS Microbiol Lett* **186**:85–90.
- 643 Kaniga K, Delor I, Cornelis GR. 1991. A wide-host-range suicide vector for improving reverse genetics  
644 in Gram-negative bacteria: inactivation of the blaA gene of *Yersinia enterocolitica*. *Gene* **109**:137–  
645 141. doi:10.1016/0378-1119(91)90599-7
- 646 Keller B, Mühlenkamp M, Deuschle E, Siegfried A, Mössner S, Schade J, Griesinger T, Katava N,  
647 Braunsdorf C, Fehrenbacher B, Jiménez-Soto LF, Schaller M, Haas R, Genth H, Retta SF, Meyer H,  
648 Böttcher RT, Zent R, Schütz M, Autenrieth IB, Bohn E. 2015. *Yersinia enterocolitica* exploits  
649 different pathways to accomplish adhesion and toxin injection into host cells. *Cell Microbiol*  
650 **17**:1179–1204. doi:10.1111/cmi.12429
- 651 Krulwich TA, Sachs G, Padan E. 2011. Molecular aspects of bacterial pH sensing and homeostasis. *Nat*  
652 *Rev Microbiol* **9**:330–343. doi:10.1038/nrmicro2549
- 653 Kudryashev M, Stenta M, Schmelz S, Amstutz M, Wiesand U, Castaño-Díez D, Degiacomi MTM,  
654 Münnich S, Bleck CKC, Kowal J, Diepold A, Heinz DWD, Dal Peraro M, Cornelis GR, Stahlberg H.  
655 2013. In situ structural analysis of the *Yersinia enterocolitica* injectisome. *Elife* **2**:e00792.  
656 doi:10.7554/eLife.00792

- 657 Lara-Tejero M, Kato J, Wagner S, Liu X, Galán JE. 2011. A Sorting Platform Determines the Order of  
658 Protein Secretion in Bacterial Type III Systems. *Science (80- )* **331**:1188–91.  
659 doi:10.1126/science.1201476
- 660 Leo JC, Elovaara H, Bihan D, Pugh N, Kilpinen SK, Raynal N, Skurnik M, Farndale RW, Goldman A. 2010.  
661 First analysis of a bacterial collagen-binding protein with collagen toolkits: Promiscuous binding of  
662 YadA to collagens may explain how YadA interferes with host processes. *Infect Immun* **78**:3226–  
663 3236. doi:10.1128/IAI.01057-09
- 664 Leo JC, Elovaara H, Brodsky B, Skurnik M, Goldman A. 2008. The Yersinia adhesin YadA binds to a  
665 collagenous triple-helical conformation but without sequence specificity. *Protein Eng Des Sel*  
666 **21**:475–484. doi:10.1093/protein/gzn025
- 667 Leo JC, Oberhettinger P, Schütz M, Linke D. 2015. The inverse autotransporter family: intimin, invasins  
668 and related proteins. *Int J Med Microbiol* **305**:276–82. doi:10.1016/j.ijmm.2014.12.011
- 669 Mauracher CA, Gillam S, Shukin R, Tingle AJ. 1991. pH-dependent solubility shift of rubella virus capsid  
670 protein. *Virology* **181**:773–777. doi:10.1016/0042-6822(91)90916-Y
- 671 McClements DJ, Li Y. 2010. Review of in vitro digestion models for rapid screening of emulsion-based  
672 systems. *Food Funct* **1**:32. doi:10.1039/c0fo00111b
- 673 Meuskens I, Saragliadis A, Leo JCC, Linke D. 2019. Type V Secretion Systems: An Overview of Passenger  
674 Domain Functions. *Front Microbiol* **10**:1–19. doi:10.3389/fmicb.2019.01163
- 675 Miesenböck G, De Angelis DA, Rothman JE. 1998. Visualizing secretion and synaptic transmission with  
676 pH-sensitive green fluorescent proteins. *Nature* **394**:192–5. doi:10.1038/28190
- 677 Milne-Davies B, Helbig C, Wimmi S, Cheng DWC, Paczia N, Diepold A. 2019. Life After Secretion—  
678 Yersinia enterocolitica Rapidly Toggles Effector Secretion and Can Resume Cell Division in Response  
679 to Changing External Conditions. *Front Microbiol* **10**:2128. doi:10.3389/fmicb.2019.02128
- 680 Morimoto Y V, Kojima S, Namba K, Minamino T. 2011. M153r mutation in a pH-sensitive green  
681 fluorescent protein stabilizes its fusion proteins. *PLoS One* **6**:e19598.  
682 doi:10.1371/journal.pone.0019598
- 683 Mota LJ, Journet L, Sorg I, Agrain C, Cornelis GR. 2005. Bacterial injectisomes: needle length does  
684 matter. *Science (80- )* **307**:2005.
- 685 Mühlenkamp M, Oberhettinger P, Leo JC, Linke D, Schütz MS. 2015a. Yersinia adhesin A (YadA)—  
686 beauty & beast. *Int J Med Microbiol* **305**:252–8. doi:10.1016/j.ijmm.2014.12.008
- 687 Mühlenkamp M, Oberhettinger P, Leo JCC, Linke D, Schütz MSS. 2015b. Yersinia adhesin A (YadA) -  
688 Beauty & beast. *Int J Med Microbiol* **305**:252–258. doi:10.1016/j.ijmm.2014.12.008
- 689 Nakamura S, Kami-ike N, Yokota JP, Kudo S, Minamino T, Namba K. 2009. Effect of Intracellular pH on  
690 the Torque-Speed Relationship of Bacterial Proton-Driven Flagellar Motor. *J Mol Biol* **386**:332–338.  
691 doi:10.1016/j.jmb.2008.12.034
- 692 Nans A, Kudryashev M, Saibil HR, Hayward RD. 2015. Structure of a bacterial type III secretion system  
693 in contact with a host membrane in situ. *Nat Commun* **6**:10114. doi:10.1038/ncomms10114
- 694 Petrovska I, Nüske E, Munder MC, Kulasegaran G, Malinowska L, Kroschwald S, Richter D, Fahmy K,  
695 Gibson K, Verbavatz J-M, Alberti S. 2014. Filament formation by metabolic enzymes is a specific  
696 adaptation to an advanced state of cellular starvation. *Elife* **3**. doi:10.7554/eLife.02409
- 697 Rocha JM, Richardson CJ, Zhang M, Darch CM, Cai E, Diepold A, Gahlmann A. 2018. Single-molecule

- 698 tracking in live *Yersinia enterocolitica* reveals distinct cytosolic complexes of injectisome subunits.  
699 *Integr Biol* **10**:502–515. doi:10.1039/C8IB00075A
- 700 Ross J, Plano G V. 2011. A C-Terminal Region of *Yersinia pestis* YscD Binds the Outer Membrane  
701 Secretin YscC. *J Bacteriol* **193**:2276–2289.
- 702 Saragliadis A, Linke D. 2019. Assay development for the discovery of small-molecule inhibitors of YadA  
703 adhesion to collagen. *Cell Surf* **5**:100025. doi:10.1016/j.tcs.2019.100025
- 704 Schindelin J, Arganda-Carreras I, Frise E, Kaynig V, Longair M, Pietzsch T, Preibisch S, Rueden C,  
705 Saalfeld S, Schmid B, Tinevez J-Y, White DJ, Hartenstein V, Eliceiri K, Tomancak P, Cardona A. 2012.  
706 Fiji: an open-source platform for biological-image analysis. *Nat Methods* **9**:676–682.  
707 doi:10.1038/nmeth.2019
- 708 Slonczewski JL, Rosen BP, Alger JR, Macnab RM. 1981. pH homeostasis in *Escherichia coli*:  
709 measurement by <sup>31</sup>P nuclear magnetic resonance of methylphosphonate and phosphate. *Proc*  
710 *Natl Acad Sci U S A* **78**:6271–5.
- 711 Sory M-P, Boland A, Lambermont I, Cornelis GR. 1995. Identification of the YopE and YopH domains  
712 required for secretion and internalization into the cytosol of macrophages, using the *cyaA* gene  
713 fusion approach. *Proc Natl Acad Sci U S A* **92**:11998–12002.
- 714 Stingl K, De Reuse H. 2005. Staying alive overdosed: How does *Helicobacter pylori* control urease  
715 activity? *Int J Med Microbiol* **295**:307–315. doi:10.1016/J.IJMM.2005.06.006
- 716 Tachiyama S, Chang Y, Muthuramalingam M, Hu B, Barta ML, Picking WL, Liu J, Picking WD. 2019. The  
717 cytoplasmic domain of MxiG interacts with MxiK and directs assembly of the sorting platform in  
718 the *Shigella* type III secretion system. *J Biol Chem* jbc.RA119.009125.  
719 doi:10.1074/jbc.RA119.009125
- 720 Taylor DJ, Krishna NK, Canady MA, Schneemann A, Johnson JE. 2002. Large-scale, pH-dependent,  
721 quaternary structure changes in an RNA virus capsid are reversible in the absence of subunit  
722 autoproteolysis. *J Virol* **76**:9972–80. doi:10.1128/jvi.76.19.9972-9980.2002
- 723 Terti R, Skurnik M, Vartio T, Kuusela P. 1992. Adhesion protein YadA of *Yersinia* species mediates  
724 binding of bacteria to fibronectin. *Infect Immun* **60**:3021–3024.
- 725 Tokunaga M, Imamoto N, Sakata-Sogawa K. 2008. Highly inclined thin illumination enables clear  
726 single-molecule imaging in cells. *Nat Methods* **5**:159–61. doi:10.1038/nmeth1171
- 727 Wolter S, Löscherberger A, Holm T, Aufmkolk S, Dabauvalle M-C, van de Linde S, Sauer M. 2012.  
728 rapidSTORM: accurate, fast open-source software for localization microscopy. *Nat Methods*  
729 **9**:1040–1. doi:10.1038/nmeth.2224
- 730 Young GM, Amid D, Miller VL. 1996. A bifunctional urease enhances survival of pathogenic *Yersinia*  
731 *enterocolitica* and *Morganella morganii* at low pH. *J Bacteriol* **178**:6487–95.  
732 doi:10.1128/JB.178.22.6487-6495.1996
- 733 Yu X-J, Grabe GJ, Liu M, Mota LJ, Holden DW. 2018. SsaV Interacts with SsaL to Control the Translocon-  
734 to-Effector Switch in the *Salmonella* SPI-2 Type Three Secretion System. *MBio* **9**:e01149-18.  
735 doi:10.1128/mBio.01149-18
- 736 Yu X-J, McGourty K, Liu M, Unsworth KE, Holden DW. 2010. pH sensing by intracellular *Salmonella*  
737 induces effector translocation. *Science (80- )* **328**:1040–3. doi:10.1126/science.1189000

bioRxiv preprint doi: <https://doi.org/10.1101/869214>; this version posted December 9, 2019. The copyright holder for this preprint (which was not certified by peer review) is the author/funder, who has granted bioRxiv a license to display the preprint in perpetuity. It is made available under aCC-BY 4.0 International license.

| Strain                                 | Genotype                                                                                                                                                                                                                                 | Reference                                   |
|----------------------------------------|------------------------------------------------------------------------------------------------------------------------------------------------------------------------------------------------------------------------------------------|---------------------------------------------|
| MRS40                                  | Wild-type pYV <i>Y. enterocolitica</i> E40 $\Delta$ <i>blaA</i>                                                                                                                                                                          | (Sory <i>et al.</i> , 1995)                 |
| IML421 <i>asd</i> (HOPEM <i>Tasd</i> ) | MRS40 <i>yopO</i> <sub><math>\Delta</math>112-427</sub> <i>yopE</i> <sub>21</sub> <i>yopH</i> <sub><math>\Delta</math>11-352</sub><br><i>yopM</i> <sub>23</sub> <i>yopP</i> <sub>23</sub> <i>yopT</i> <sub>135</sub> $\Delta$ <i>asd</i> | (Kudryashev <i>et al.</i> , 2013)           |
| AD4016                                 | MRS40 <i>egfp-sctQ</i>                                                                                                                                                                                                                   | (Diepold <i>et al.</i> , 2010)              |
| AD4085                                 | IML421 <i>asd</i> <i>egfp-sctQ</i>                                                                                                                                                                                                       | (Kudryashev <i>et al.</i> , 2013)           |
| AD4175                                 | IML421 <i>asd</i> <i>sctV-egfp</i><br>(mutated with pAD208)                                                                                                                                                                              | This work                                   |
| AD4306                                 | IML421 <i>asd</i> <i>egfp-sctD</i>                                                                                                                                                                                                       | (Diepold <i>et al.</i> , 2015)              |
| AD4411                                 | IML421 <i>asd</i> <i>egfp-sctQ</i> $\Delta$ <i>sctD</i>                                                                                                                                                                                  | (Diepold <i>et al.</i> , 2017)              |
| AD4439                                 | IML421 <i>asd</i> <i>pamcherry1-sctD</i><br>(mutated with pAD439)                                                                                                                                                                        | This work                                   |
| AD4474                                 | IML421 <i>asd</i> <i>efgp-sctK</i>                                                                                                                                                                                                       | (Diepold <i>et al.</i> , 2017)              |
| ADTM4514                               | IML421 <i>asd</i> <i>egfp-sctN</i>                                                                                                                                                                                                       | (Diepold <i>et al.</i> , 2017)              |
| ADTM4520                               | IML421 <i>asd</i> <i>egfp-sctL</i>                                                                                                                                                                                                       | (Diepold <i>et al.</i> , 2017)              |
| ADTM4521                               | IML421 <i>asd</i> <i>mcherry-sctL</i>                                                                                                                                                                                                    | (Diepold <i>et al.</i> , 2017)              |
| ADTM4525                               | IML421 <i>asd</i> <i>halo-sctL</i>                                                                                                                                                                                                       | (Diepold <i>et al.</i> , 2017)              |
| ADMH4536                               | IML421 <i>asd</i> <i>halo-sctL</i> $\Delta$ <i>sctF</i>                                                                                                                                                                                  | This work                                   |
| DL001                                  | <i>P. aeruginosa</i> PAO1 <i>egfp-sctQ</i>                                                                                                                                                                                               | Lampaki <i>et al.</i> , 2019<br>(submitted) |

| Plasmids   | Genotype                                                                  | Reference                      |
|------------|---------------------------------------------------------------------------|--------------------------------|
| pBAD-His B | pBR322-derived expression vector                                          | Invitrogen                     |
| pKNG101    | <i>oriR6K</i> <i>sacBR+</i> <i>oriTRK2</i> <i>strAB+</i> (suicide vector) | (Kaniga <i>et al.</i> , 1991)  |
| pAD208     | <i>pKNG101-sctV-egfp</i>                                                  | (Diepold <i>et al.</i> , 2017) |
| pAD439     | <i>pKNG101-pamcherry1-sctD</i>                                            | This work                      |
| pAD638     | <i>pBAD::sctF</i> <sub>55c</sub>                                          | This work                      |
| pEE010     | <i>pBAD::sctD</i> <sub>H193A,H205S,R214H,H353Y,H376G</sub>                | This work                      |
| pISO85     | <i>pKNG101-<math>\Delta</math>sctF</i>                                    | (Diepold <i>et al.</i> , 2010) |
| pSW001     | <i>pBAD::pHluorin</i>                                                     | This work                      |
| pSW022     | <i>pBAD::sctD</i>                                                         | This work                      |

**Supplementary Table 1 – Strains and plasmids used in this study**

bioRxiv preprint doi: <https://doi.org/10.1101/869214>; this version posted December 9, 2019. The copyright holder for this preprint (which was not certified by peer review) is the author/funder, who has granted bioRxiv a license to display the preprint in perpetuity. It is made available under aCC-BY 4.0 International license.

| <b>Low salt LB medium</b> | <b>concentration</b> |
|---------------------------|----------------------|
| Yeast extract             | 5 g/l                |
| Trypton                   | 10 g/l               |
| NaCl                      | 3 g/l                |
| Agarose (for plates)      | 1.5%                 |

  

| <b>BHI medium</b>           | <b>concentration</b> |
|-----------------------------|----------------------|
| Brain heart infusion solids | 17.5 g/l             |
| Peptones                    | 10.0 g/l             |
| Glucose                     | 2.0 g/l              |
| Sodium chloride             | 5.0 g/l              |
| Disodium hydrogen phosphate | 2.5 g/l              |
| Agarose (for plates)        | 1.5%                 |

  

| <b>Minimal microcopy medium</b>                                    | <b>concentration</b> |
|--------------------------------------------------------------------|----------------------|
| HEPES pH 7.2                                                       | 100 mM               |
| (NH <sub>4</sub> ) <sub>2</sub> SO <sub>4</sub> , ammonium sulfate | 5 mM                 |
| NaCl                                                               | 100 mM               |
| Sodium glutamate                                                   | 20 mM                |
| MgCl <sub>2</sub>                                                  | 10 mM                |
| K <sub>2</sub> SO <sub>4</sub>                                     | 5 mM                 |
| MES                                                                | 5 mM                 |
| Glycine                                                            | 50mM                 |
| Casamino acids                                                     | 0.5%                 |
| Agarose (for agarose pads)                                         | 1.5%                 |

**Supplementary Table 2 – Composition of media used in this study**

bioRxiv preprint doi: <https://doi.org/10.1101/869214>; this version posted December 9, 2019. The copyright holder for this preprint (which was not certified by peer review) is the author/funder, who has granted bioRxiv a license to display the preprint in perpetuity. It is made available under aCC-BY 4.0 International license.

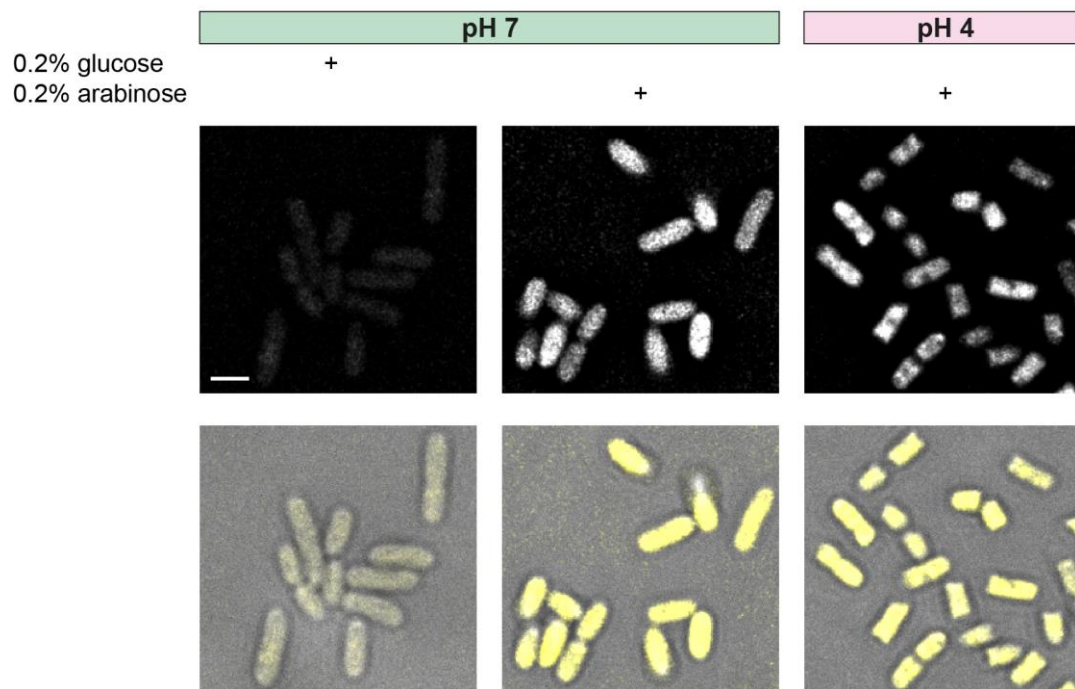

**Suppl. Fig. 1 – Protein synthesis in *Y. enterocolitica* is not suppressed at an external pH of 4**

*Y. enterocolitica* dHOPEMTasd were grown at neutral pH and then subjected to different pH as indicated. EGFP expression was induced from a pBAD plasmid at the same time, and fluorescence was determined after 180 min. Top, fluorescence image in GFP channel, bottom, overlay of phase contrast (grey) and fluorescence (yellow). Scale bar, 2  $\mu$ m.

bioRxiv preprint doi: <https://doi.org/10.1101/869214>; this version posted December 9, 2019. The copyright holder for this preprint (which was not certified by peer review) is the author/funder, who has granted bioRxiv a license to display the preprint in perpetuity. It is made available under a [CC-BY 4.0 International license](#).

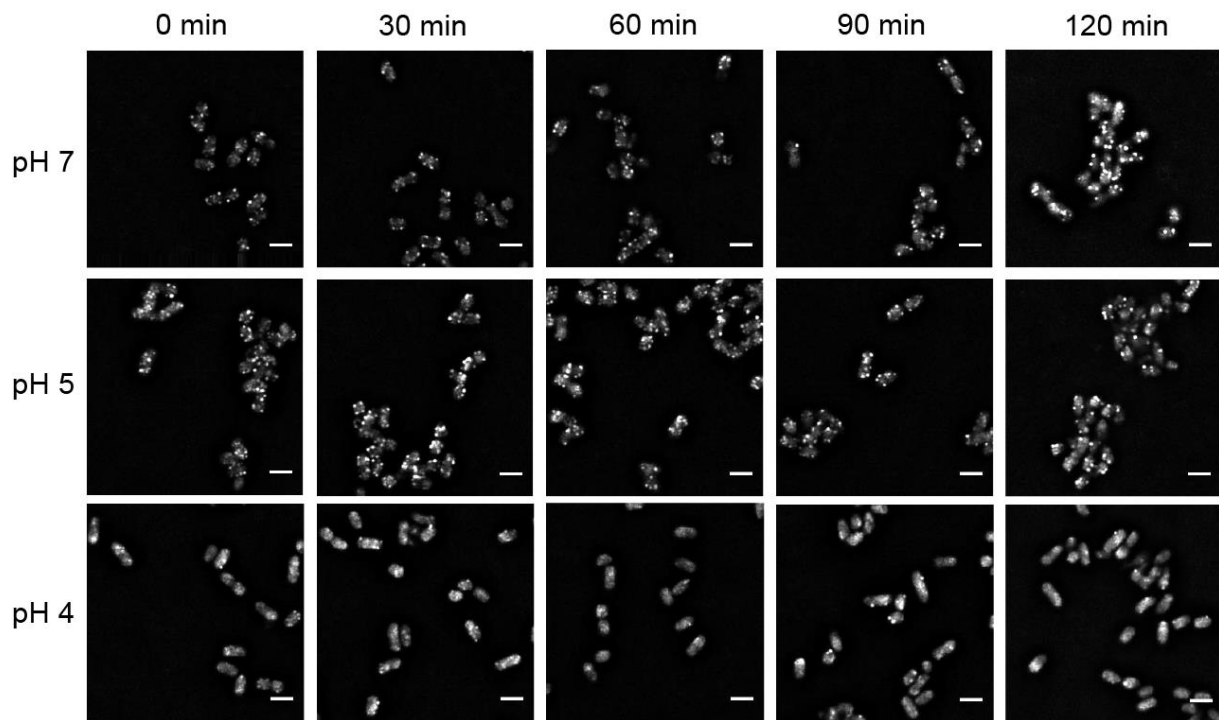

**Suppl. Fig. 2 – The localization of the cytosolic components remains stable over time**

Fluorescence micrographs of *Y. enterocolitica* EGFP-SctQ, incubated at the indicated external pH values under secreting conditions over time. Scale bars, 2  $\mu$ m.



bioRxiv preprint doi: <https://doi.org/10.1101/869214>; this version posted December 9, 2019. The copyright holder for this preprint (which was not certified by peer review) is the author/funder, who has granted bioRxiv a license to display the preprint in perpetuity. It is made available under aCC-BY 4.0 International license.

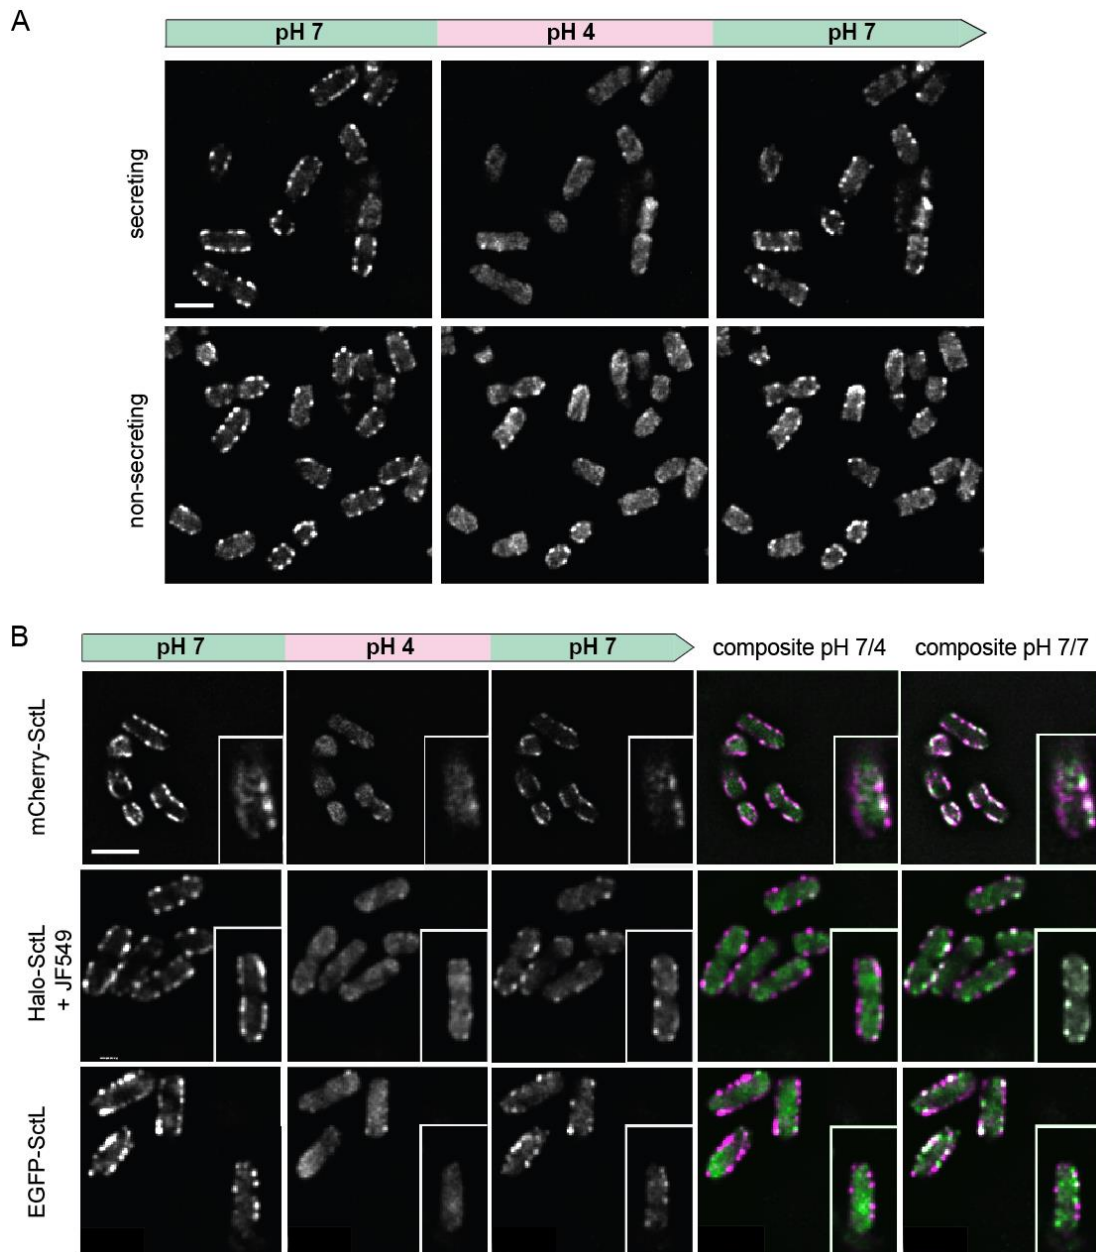

**Suppl. Fig. 3 – Dissociation of the cytosolic components at low external pH can be observed irrespective of the used visualization tag, and in both secreting and non-secreting conditions**

**(A)** Fluorescence micrographs of *Y. enterocolitica* EGFP-SctQ, incubated at the indicated external pH values under secreting conditions (top), or non-secreting conditions (bottom) over time. **(B)** Fluorescence micrographs of *Y. enterocolitica* expressing indicated labeled versions of SctL (replacing the WT gene by allelic exchange) at the indicated external pH values under secreting conditions over time. Right columns, composite images; magenta: pH 7 (first image on the left); green: pH 4 (second image on the left) or pH 7 (third image on the left), as indicated. Scale bars, 2  $\mu$ m.

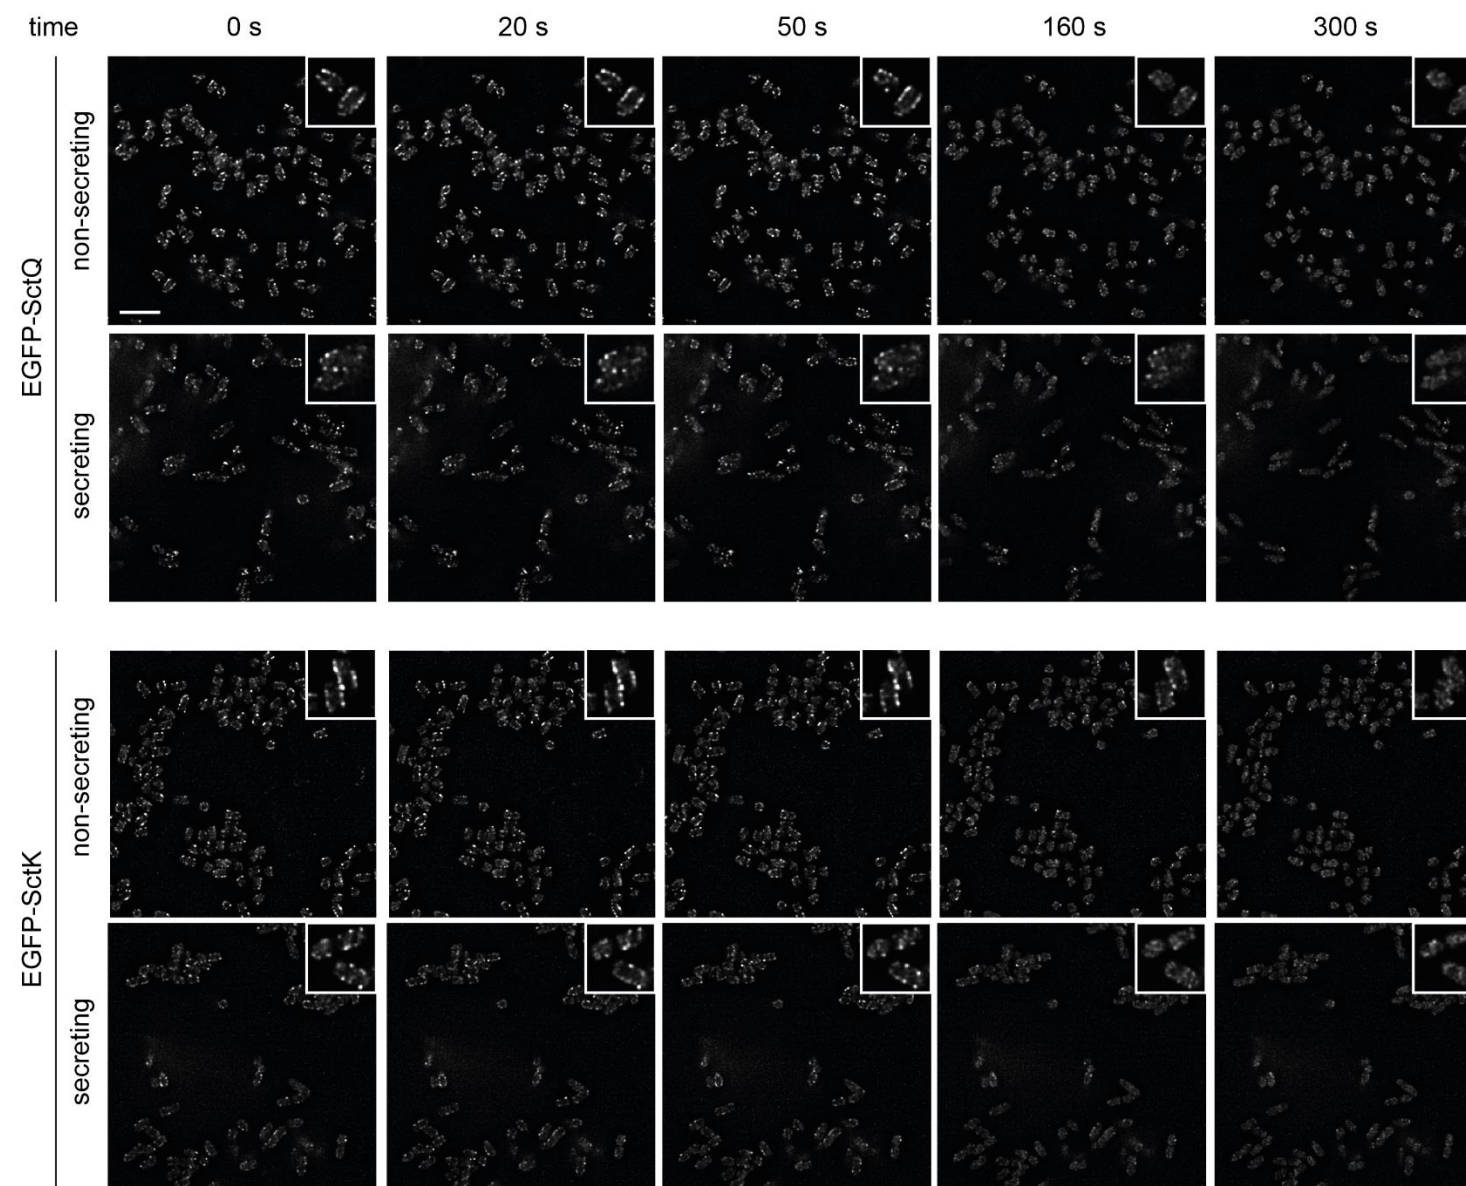

**Suppl. Fig. 4 – Dissociation kinetics of the cytosolic T3SS components under secreting and non-secreting conditions**

Fluorescence micrographs of *Y. enterocolitica* EGFP-SctQ (top) or EGFP-SctK (bottom), at the given time periods after subjecting the bacteria to an external pH of 4 in a flow cell, under secreting conditions (rows 1 and 3), or non-secreting conditions (rows 2 and 4) Scale bar, 5  $\mu$ m; insets show enlarged sections of the micrographs.

bioRxiv preprint doi: <https://doi.org/10.1101/869214>; this version posted December 9, 2019. The copyright holder for this preprint (which was not certified by peer review) is the author/funder, who has granted bioRxiv a license to display the preprint in perpetuity. It is made available under a [CC-BY 4.0 International license](#).

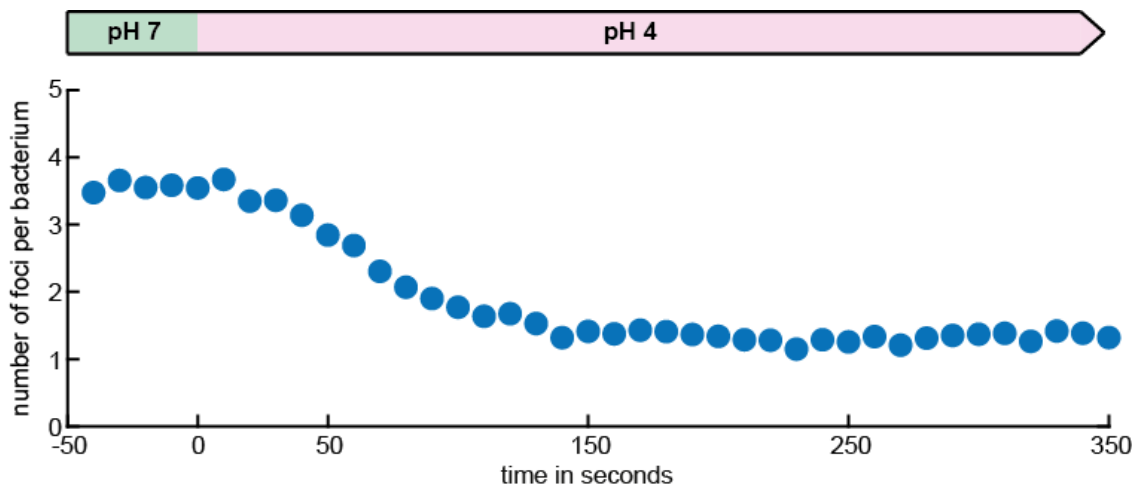

**Suppl. Fig. 5: Quantification of EGFP-SctQ dissociation kinetics upon exposure to external pH 4.**

The number of fluorescent EGFP-SctQ foci detected by BiofilmQ (see Material and Methods for details) was determined every 10 s in a flow cell upon changing the external pH from 7 to 4.  $n = 270$  bacteria.

bioRxiv preprint doi: <https://doi.org/10.1101/869214>; this version posted December 9, 2019. The copyright holder for this preprint (which was not certified by peer review) is the author/funder, who has granted bioRxiv a license to display the preprint in perpetuity. It is made available under aCC-BY 4.0 International license.

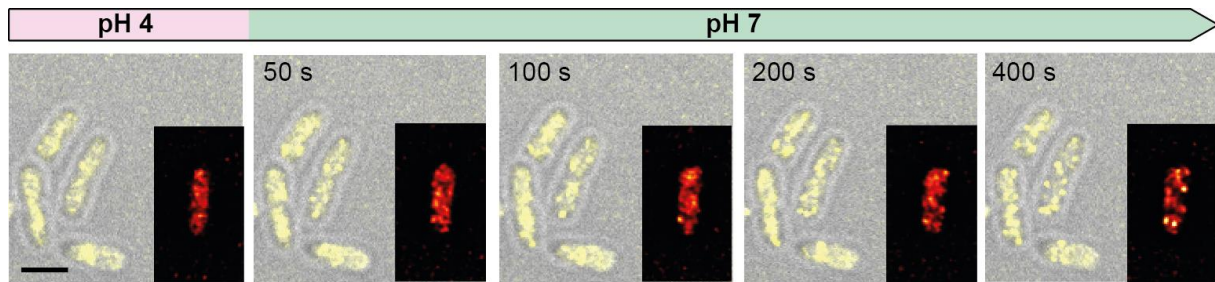

**Suppl. Fig. 6: Re-association kinetics of EGFP-SctQ upon restoration of neutral external pH**

Kinetics of EGFP-SctQ re-association after pH shift from 4 to 7. Overlay of phase contrast (grey) and fluorescence images (yellow); insets, enlarged single bacteria, visualized with the ImageJ red-hot color scale. Scale bar, 2  $\mu$ m.

bioRxiv preprint doi: <https://doi.org/10.1101/869214>; this version posted December 9, 2019. The copyright holder for this preprint (which was not certified by peer review) is the author/funder, who has granted bioRxiv a license to display the preprint in perpetuity. It is made available under aCC-BY 4.0 International license.

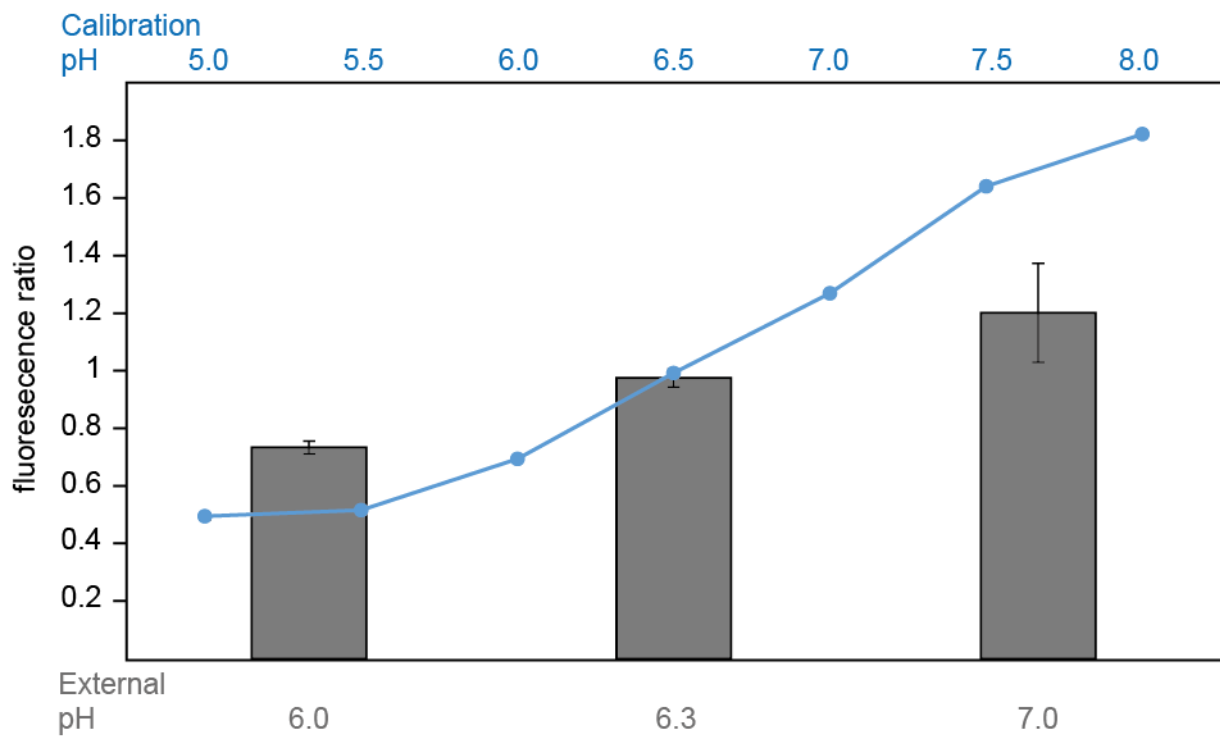

**Suppl. Fig. 7: Internal pH is equilibrated with external pH upon DNP treatment**

Blue curve, calibration of ( $EX_{390nm} / EX_{475nm}$ ) fluorescence ratio of purified pHluorin<sub>M153R</sub> for the pH values indicated on the top (blue) (see Fig. 3A). Technical triplicate, error bars too small to display. Grey bars, determination of cytosolic pH upon incubating bacteria at the indicated external pH values (bottom) in presence of 2 mM DNP. Fluorescence ratio ( $EX_{390nm} / EX_{475nm}$ ) of bacteria expressing cytosolic pHluorin<sub>M153R</sub>.  $n = 3$ , error bars denote standard deviation.

bioRxiv preprint doi: <https://doi.org/10.1101/869214>; this version posted December 9, 2019. The copyright holder for this preprint (which was not certified by peer review) is the author/funder, who has granted bioRxiv a license to display the preprint in perpetuity. It is made available under a [CC-BY 4.0 International license](#).

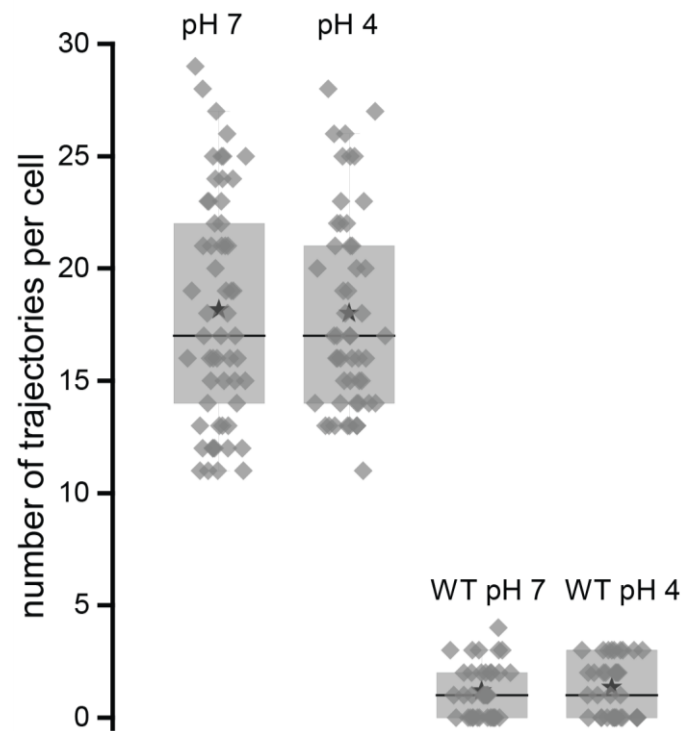

**Suppl. Fig. 8 - Number of SctD trajectories in *Y. enterocolitica* cells at pH 7 and pH 4 compared to the number of false positives measured in wild type cells**

Number of PAmCherry-SctD trajectories per single living *Y. enterocolitica* cells at pH 7 and at pH 4 both exhibit a medium trajectory number of 17 trajectories per cell and a mean of  $18.2 \pm 5.1$  s.d. (pH 7) and  $18.0 \pm 4.4$  s.d. (pH 4). As a control, strains expressing PAmCherry-SctD were mixed with wild type cells during the sample preparation. False positive trajectories from the background signal of single wild type cells in the same movies yield a median of one false positive trajectory per cell for both conditions and a mean of  $1.2 \pm 1.1$  s.d. (pH 7) and  $1.3 \pm 1.2$  s.d. (pH 4). Symbols in the histogram are black star mean, black line median, whisker range 5-95% and box range 25-75%.



bioRxiv preprint doi: <https://doi.org/10.1101/869214>; this version posted December 9, 2019. The copyright holder for this preprint (which was not certified by peer review) is the author/funder, who has granted bioRxiv a license to display the preprint in perpetuity. It is made available under aCC-BY 4.0 International license.

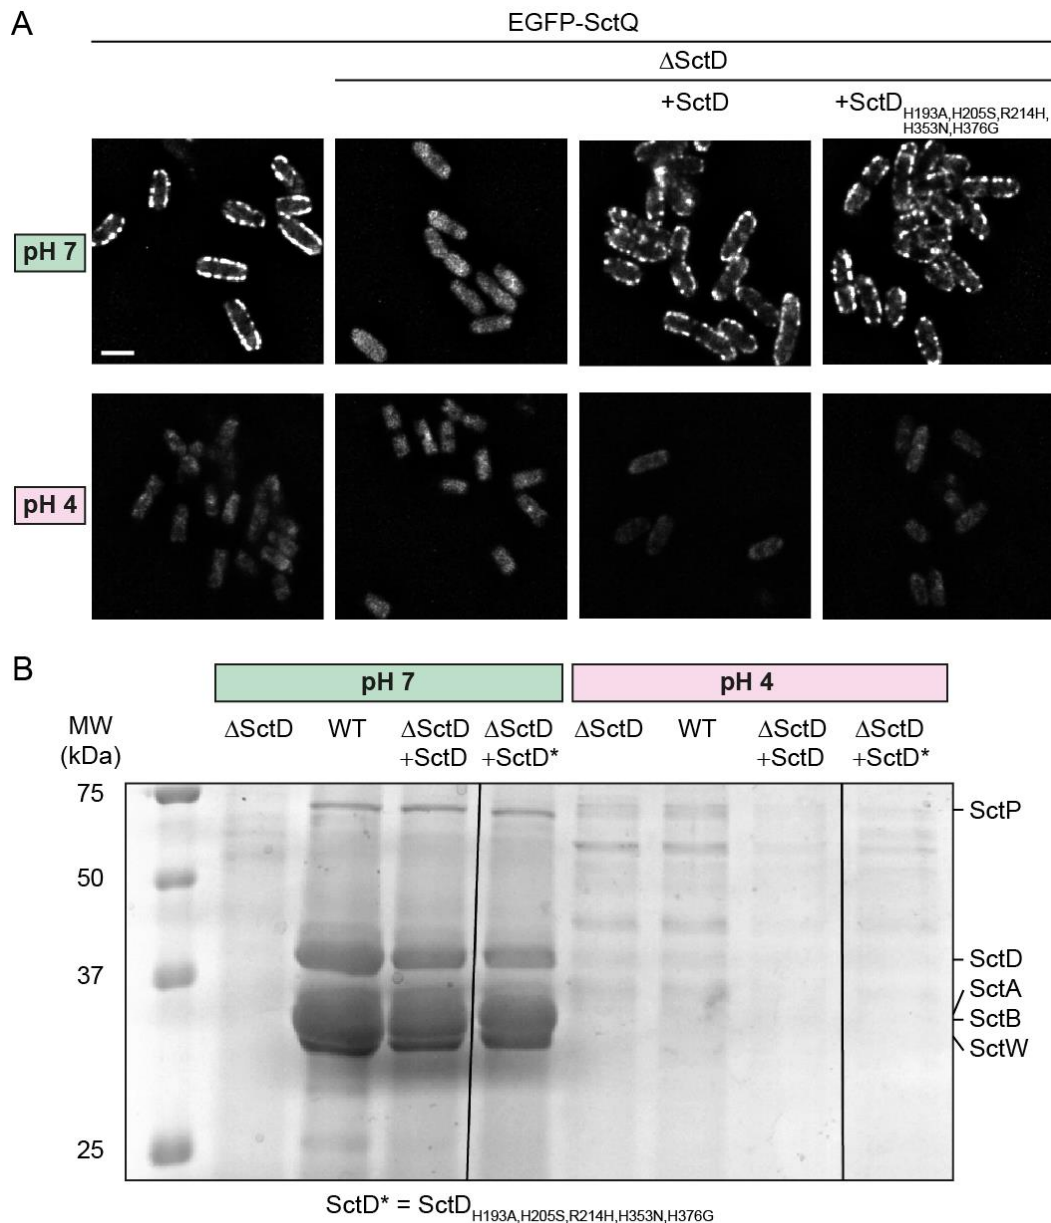

**Suppl. Fig. 10 – Point mutations in SctD do no suppress the pH-dependent dissociation of cytosolic T3SS components and suppression of secretion at low external pH.**

**(A)** Fluorescence micrographs of *Y. enterocolitica* EGFP-SctQ in strains lacking SctD (column 2-4) and complemented *in trans* with wild-type SctD (column 3) or an SctD multiple point mutant (see main text for details), at pH 7 (top) or pH 4 (bottom). The mutant SctD confers the same phenotype on SctQ localization as wild-type SctD under both conditions. Scale bar, 2  $\mu$ m. **(B)** *In vitro* secretion assay showing the export of native T3SS substrates in the strains used in (A), at external pH of 7 (left) or 4 (right). All samples were analyzed on the same SDS-PAGE gel, vertical lines denote the omission of intermediate lanes. Molecular weight in kDa and exported proteins are indicated and the left and right side, respectively.



bioRxiv preprint doi: <https://doi.org/10.1101/869214>; this version posted December 9, 2019. The copyright holder for this preprint (which was not certified by peer review) is the author/funder, who has granted bioRxiv a license to display the preprint in perpetuity. It is made available under a [CC-BY 4.0 International license](#).

## Supplementary Movies

### Suppl. Movie 1-2 – *Y. enterocolitica* attaches to surfaces at low external pH

Suppl. Movie 1: Time-lapse phase contrast video of *Y. enterocolitica* attached to a glass cover slip in a flow cell at pH 7. The buffer was exchanged from pH 7 to pH 4 buffered media during the experiment and cells were tracked for 10 minutes with a picture taken every 10 seconds.

Suppl. Movie 2: Time-lapse phase contrast video of *Y. enterocolitica* attached to a glass cover slip in a flow cell at pH 4. During the experiment the buffer was changed from pH 4 to pH 7 and cells were tracked again for 10 minutes with a picture taken every 10 seconds. Scale bars, 2  $\mu\text{m}$ .

### Suppl. Movie 3 – The pH-induced dissociation and re-association of EGFP-SctK to the injectisome can be repeated for several cycles.

Time-lapse video of *Y. enterocolitica* expressing EGFP-SctK attached to a glass cover slip in a flow cell. After flow was started the buffer was toggled every 5 minutes between pH 7 to pH 4, as indicated. Micrographs were acquired every 10 seconds. Scale bar, 2  $\mu\text{m}$ .

### Suppl. Movie 4 – Dissociation kinetics of EGFP-SctQ upon change of external pH from 7 to 4

Time-lapse video of *Y. enterocolitica* expressing EGFP-SctQ attached to a glass cover slip in a flow cell after pH shift from 7 to 4. Left, overlay of DIC (grey) and fluorescence signal (yellow); right, fluorescent channel in red hot color scale. Bacteria were attached to the cover slip at pH 7, flow was introduced, and the buffer was switched from pH 7 to pH 4. The duration of the experiment was 10 minutes and pictures were taken every 10 seconds. Scale bar, 2  $\mu\text{m}$ .

### Suppl. Movie 5 – Re-association kinetics of EGFP-SctQ upon change of external pH from 4 to 7

Time-lapse video of *Y. enterocolitica* expressing EGFP-SctQ attached to a glass cover slip in a flow cell after pH shift from 4 to 7. Left, overlay of DIC (grey) and fluorescence signal (yellow); right, fluorescent channel in red hot color scale. Bacteria were attached to the cover slip at pH 7, flow was introduced, and the buffer was switched from pH 4 to pH 7. The duration of the experiment was 10 minutes and pictures were taken every 10 seconds. Scale bar, 2  $\mu\text{m}$ .

bioRxiv preprint doi: <https://doi.org/10.1101/869214>; this version posted December 9, 2019. The copyright holder for this preprint (which was not certified by peer review) is the author/funder, who has granted bioRxiv a license to display the preprint in perpetuity. It is made available under a [CC-BY 4.0 International license](#).

### Supplementary references

- Bzymek KP, Hamaoka BY, Ghosh P. 2012. Two translation products of *Yersinia* yscQ assemble to form a complex essential to type III secretion. *Biochemistry* **51**:1669–77. doi:10.1021/bi201792p
- Diepold A, Amstutz M, Abel S, Sorg I, Jenal U, Cornelis GR. 2010. Deciphering the assembly of the *Yersinia* type III secretion injectisome. *EMBO J* **29**:1928–1940. doi:10.1038/emboj.2010.84
- Diepold A, Kudryashev M, Delalez NJ, Berry RM, Armitage JP. 2015. Composition, Formation, and Regulation of the Cytosolic C-ring, a Dynamic Component of the Type III Secretion Injectisome. *PLoS Biol* **13**:e1002039. doi:10.1371/journal.pbio.1002039
- Diepold A, Sezgin E, Huseyin M, Mortimer T, Eggeling C, Armitage JP. 2017. A dynamic and adaptive network of cytosolic interactions governs protein export by the T3SS injectisome. *Nat Commun* **8**:15940. doi:10.1038/ncomms15940
- Käll L, Krogh A, Sonnhammer ELL. 2007. Advantages of combined transmembrane topology and signal peptide prediction--the Phobius web server. *Nucleic Acids Res* **35**:W429-32. doi:10.1093/nar/gkm256
- Kaniga K, Delor I, Cornelis GR. 1991. A wide-host-range suicide vector for improving reverse genetics in Gram-negative bacteria: inactivation of the blaA gene of *Yersinia enterocolitica*. *Gene* **109**:137–141. doi:10.1016/0378-1119(91)90599-7
- Kudryashev M, Stenta M, Schmelz S, Amstutz M, Wiesand U, Castaño-Díez D, Degiacomi MTM, Münnich S, Bleck CKC, Kowal J, Diepold A, Heinz DWD, Dal Peraro M, Cornelis GR, Stahlberg H. 2013. In situ structural analysis of the *Yersinia enterocolitica* injectisome. *Elife* **2**:e00792. doi:10.7554/eLife.00792
- Sory M-P, Boland A, Lambermont I, Cornelis GR. 1995. Identification of the YopE and YopH domains required for secretion and internalization into the cytosol of macrophages, using the cyaA gene fusion approach. *Proc Natl Acad Sci U S A* **92**:11998–12002.
- Yu X-J, Liu M, Matthews S, Holden DW. 2011. Tandem translation generates a chaperone for the *Salmonella* type III secretion system protein SsaQ. *J Biol Chem* **286**:36098–107. doi:10.1074/jbc.M111.278663
